# Supplementary material
Source: Royal Society of Chemistry journal article supplement (doi:10.1039/d6md00193a)
Supplement: d6md00193a1.pdf [file d6md00193a1.pdf]

## Design, synthesis, *in-silico* and *in-vitro* evaluation of Novel Complex Naphthalimide-Ciprofloxacin Hybrids as next-generation antimicrobial agents

Dharmendra Singh<sup>a1</sup>, Ankita Singh<sup>b1</sup>, Harikesh Kumar Gupta<sup>c</sup>, Sajida Banoo<sup>a</sup>, Sumit Maurya<sup>a</sup>, Vishwakarma Krishna Ramesh<sup>c</sup>, Khushbu Khushbu<sup>b</sup>, Ambrish Kumar<sup>a</sup>, Jyoti Kumari<sup>d</sup>, Avishek Mahapa<sup>d,e</sup>, Shruti Trivedi<sup>a</sup>, Rajnish Kumar<sup>\*c</sup>, Shashikala Verma<sup>\*b</sup>, Arunava Manna<sup>\*a</sup>

<sup>a</sup>Department of Chemistry, Institute of Science, Banaras Hindu University, Varanasi, Uttar Pradesh-221005, India

<sup>b</sup>Centre of Experimental Medicine and Surgery, Institute of Medical Sciences, Banaras Hindu University, Varanasi, Uttar Pradesh-221005, India

<sup>c</sup>Department of Pharmaceutical Engineering & Technology, Indian Institute of Technology, BHU, Varanasi, India

<sup>d</sup>Infectious Diseases Division, CSIR-Indian Institute of Integrative Medicine, Canal Road, Jammu, Jammu and Kashmir 180001, India.

<sup>e</sup>Academy of Scientific & Innovative Research (AcSIR), Ghaziabad, 201002, India.

<sup>1</sup>Contributed equally

\*Corresponding Authors:

E-mail addresses: [arunavam@bhu.ac.in](mailto:arunavam@bhu.ac.in), [shashikala.verma@bhu.ac.in](mailto:shashikala.verma@bhu.ac.in); [rajnish.phe@iitbhu.ac.in](mailto:rajnish.phe@iitbhu.ac.in)

### Table –

|                                                                  |           |
|------------------------------------------------------------------|-----------|
| 1. NMR .....                                                     | (S2-S36)  |
| 2. HRMS .....                                                    | (S37-S47) |
| 3. The first derivative curve of Thermal Denaturation study..... | (S48)     |
| 4. Molecular Dynamic Analysis.....                               | (S49-S50) |

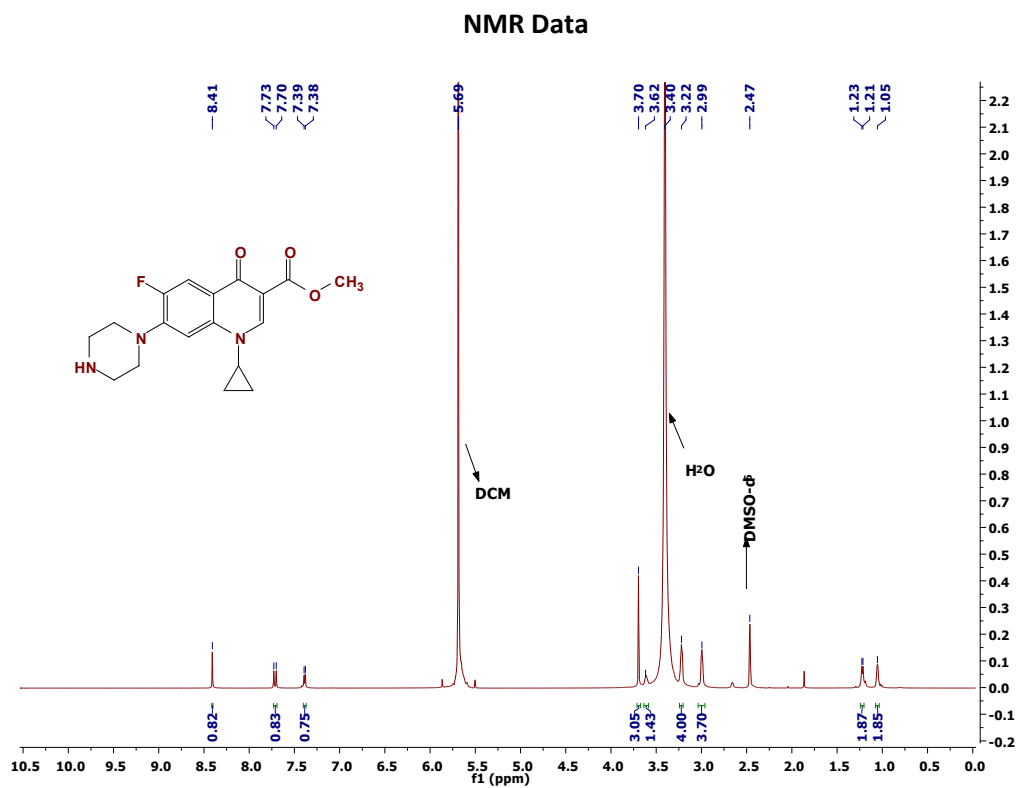

Figure S1.  $^1\text{H}$  NMR (500MHz in  $\text{DMSO-}d_6$ ) of compound (2)

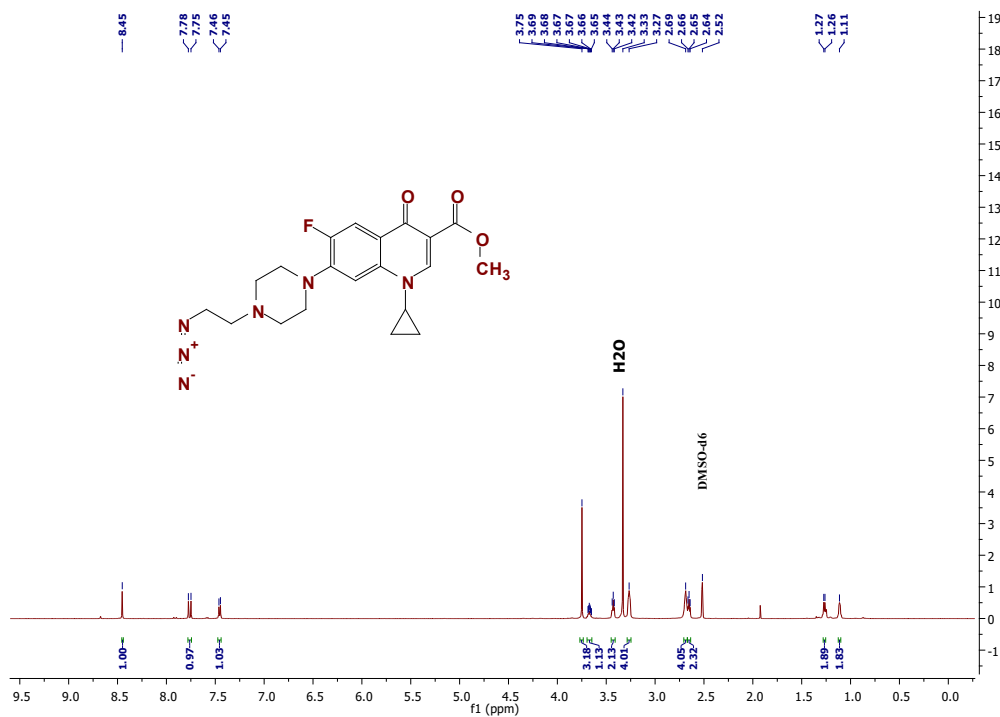

Figure S2.  $^1\text{H}$  NMR (500MHz in  $\text{DMSO-}d_6$ ) of compound (3)

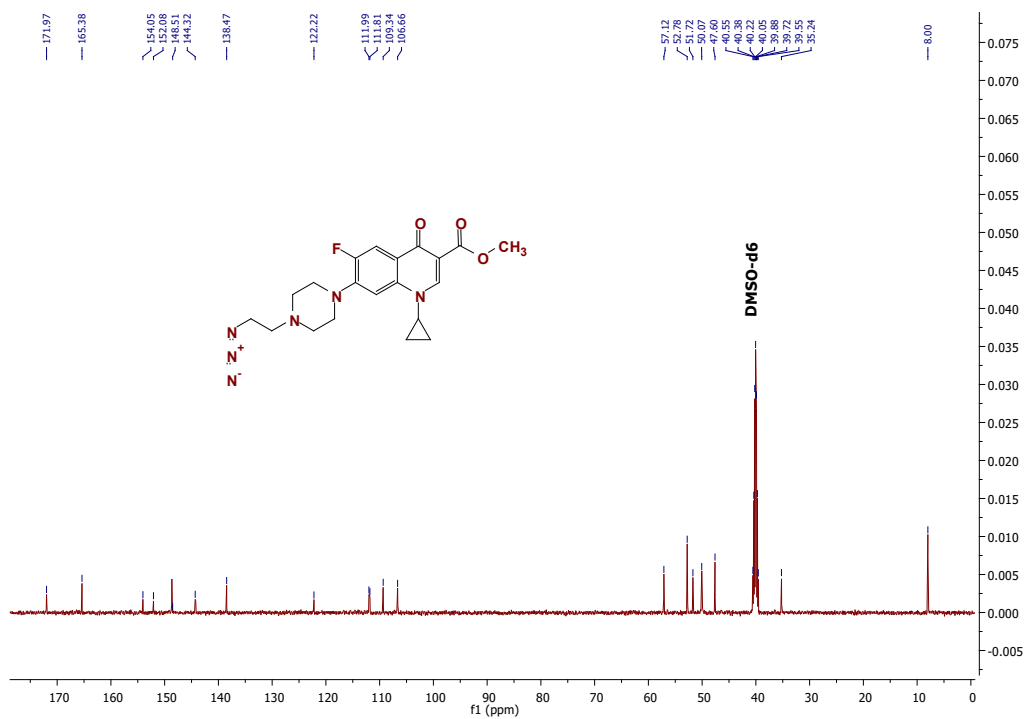

Figure S3.  $^{13}\text{C}$  NMR (126 MHz in  $\text{DMSO-}d_6$ ) of compound (3)

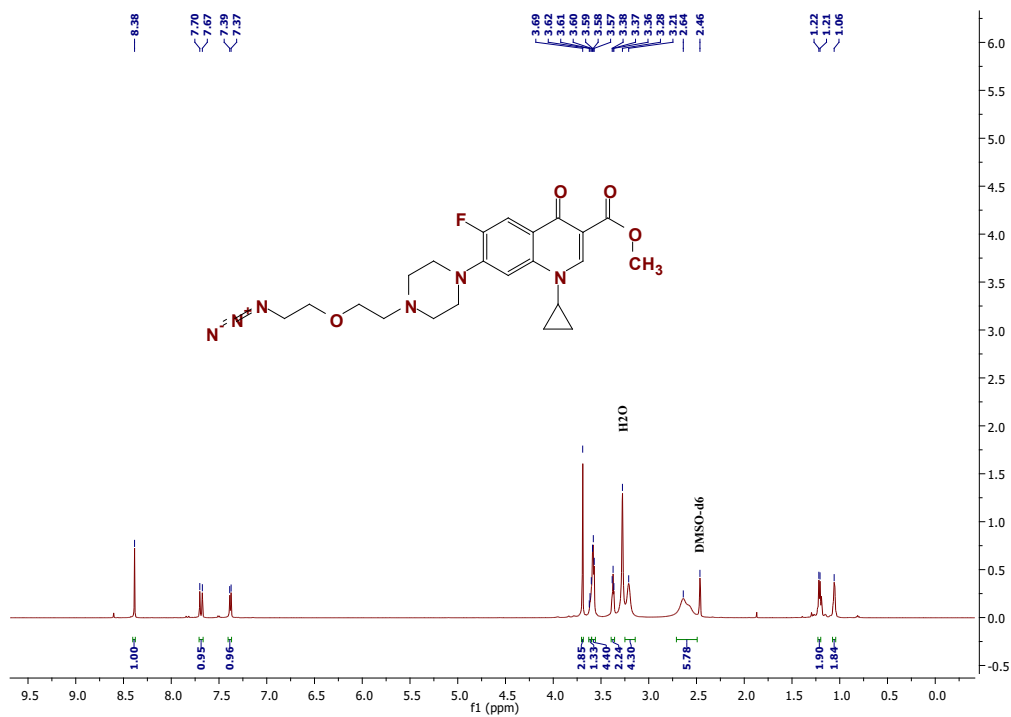

Figure S4.  $^1\text{H}$  NMR (500MHz in  $\text{DMSO-}d_6$ ) of compound (4)

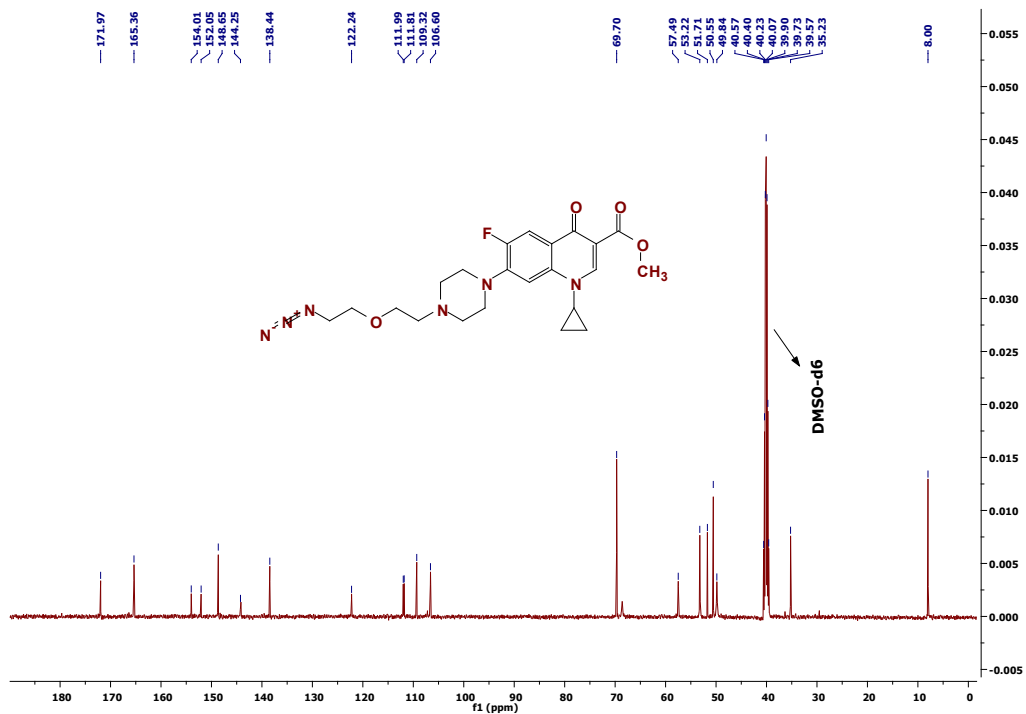

Figure S5. <sup>13</sup>C NMR (126 MHz in DMSO-d<sub>6</sub>) of compound (4)

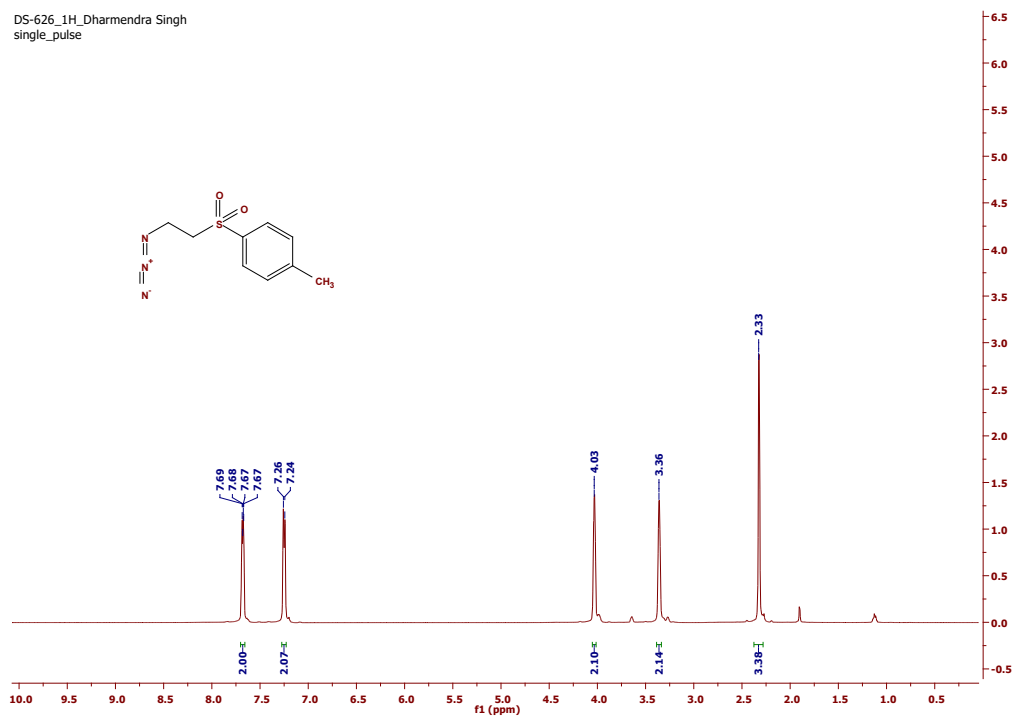

Figure S6. <sup>1</sup>H NMR (500 MHz in CDCl<sub>3</sub>) of compound (9)

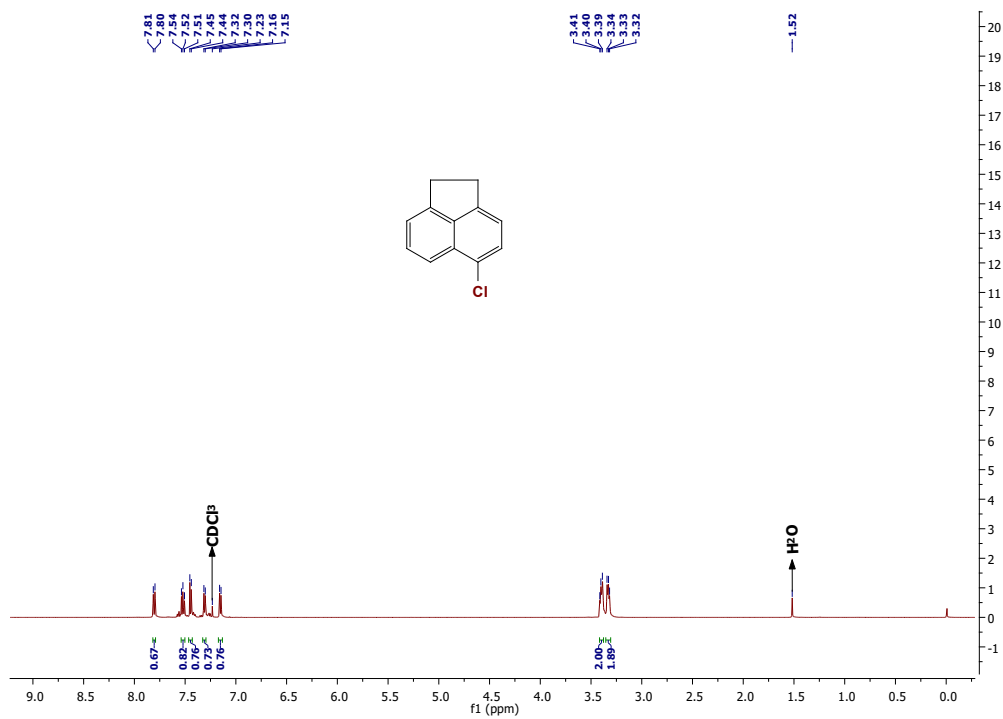

Figure S7.  $^1\text{H}$  NMR (500MHz in  $\text{CDCl}_3$ ) of compound (11a)

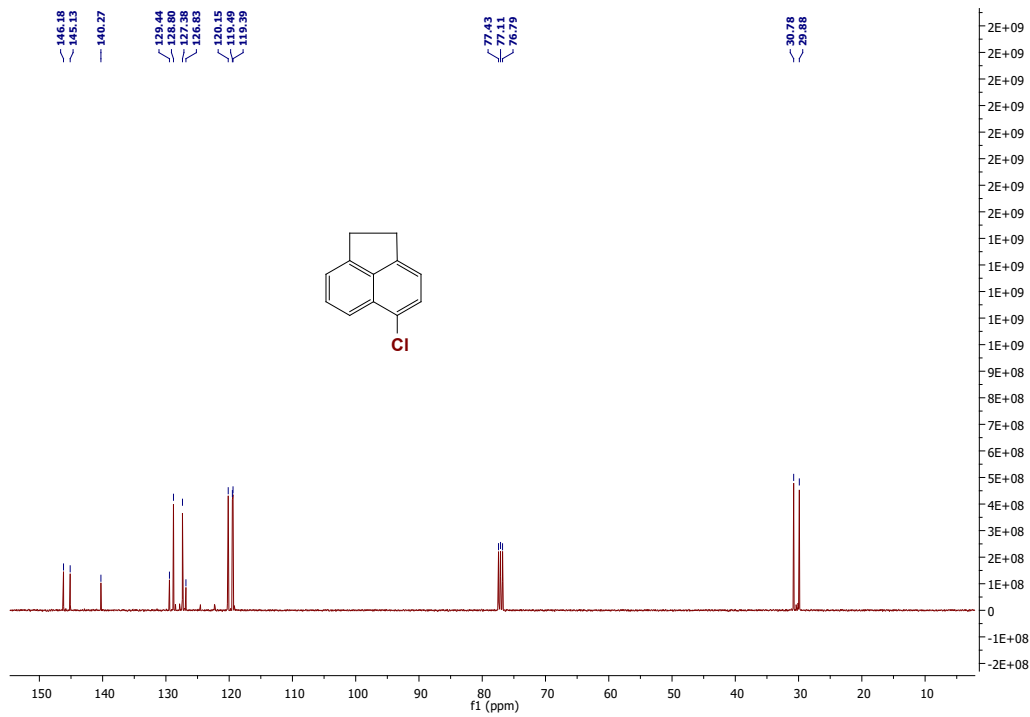

Figure S8.  $^{13}\text{C}$  NMR (126 MHz in  $\text{CDCl}_3$ ) of compound (11a)

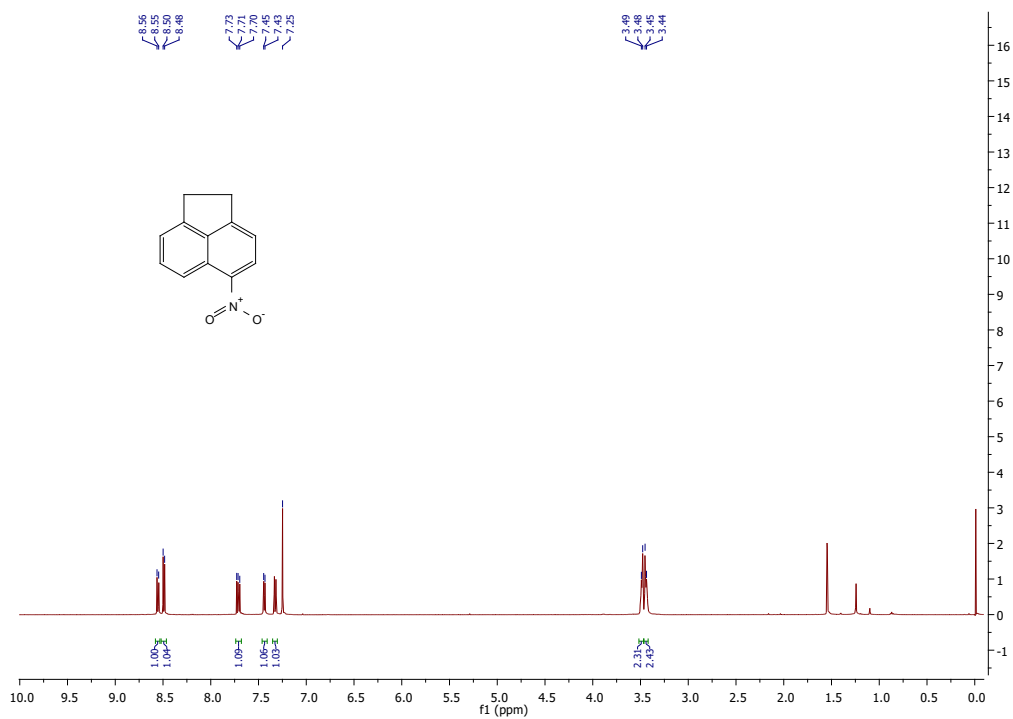

Figure S9. <sup>1</sup>H NMR (500MHz in CDCl<sub>3</sub>) of compound (11b)

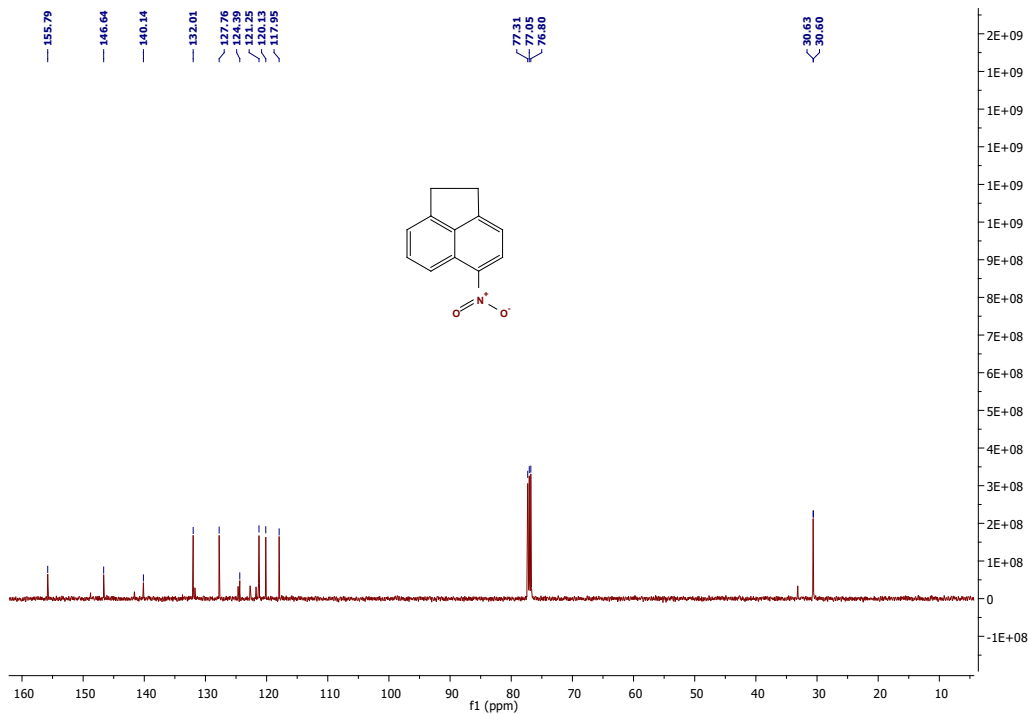

Figure S10. <sup>13</sup>C NMR (126 MHz in CDCl<sub>3</sub>) of compound (11b)

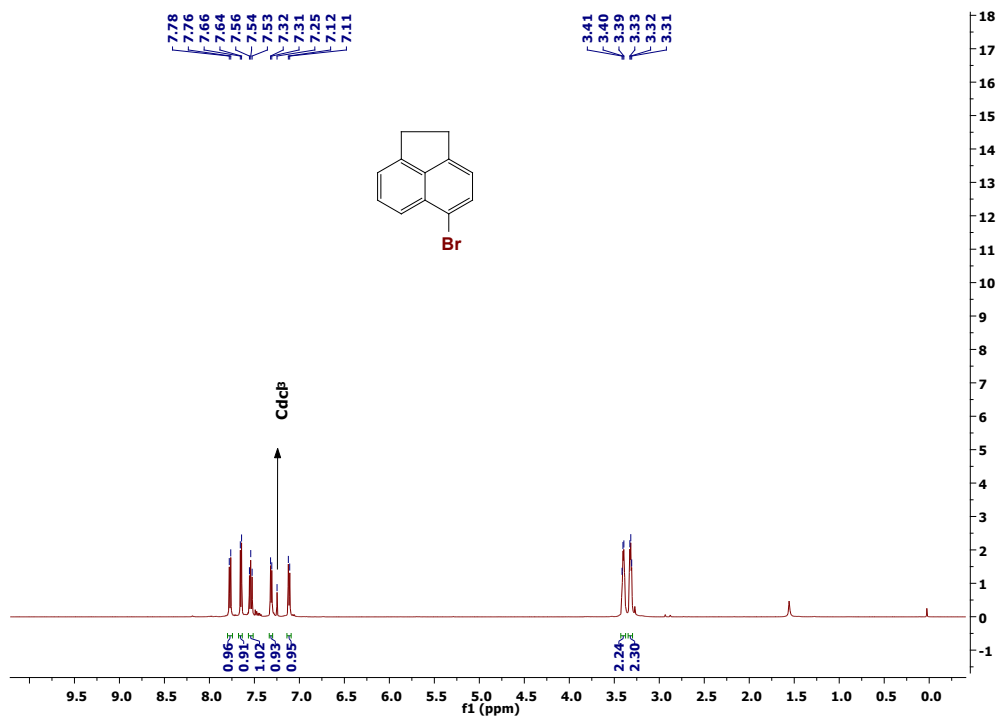

Figure S11. <sup>1</sup>H NMR (500MHz in CDCl<sub>3</sub>) of compound (11c)

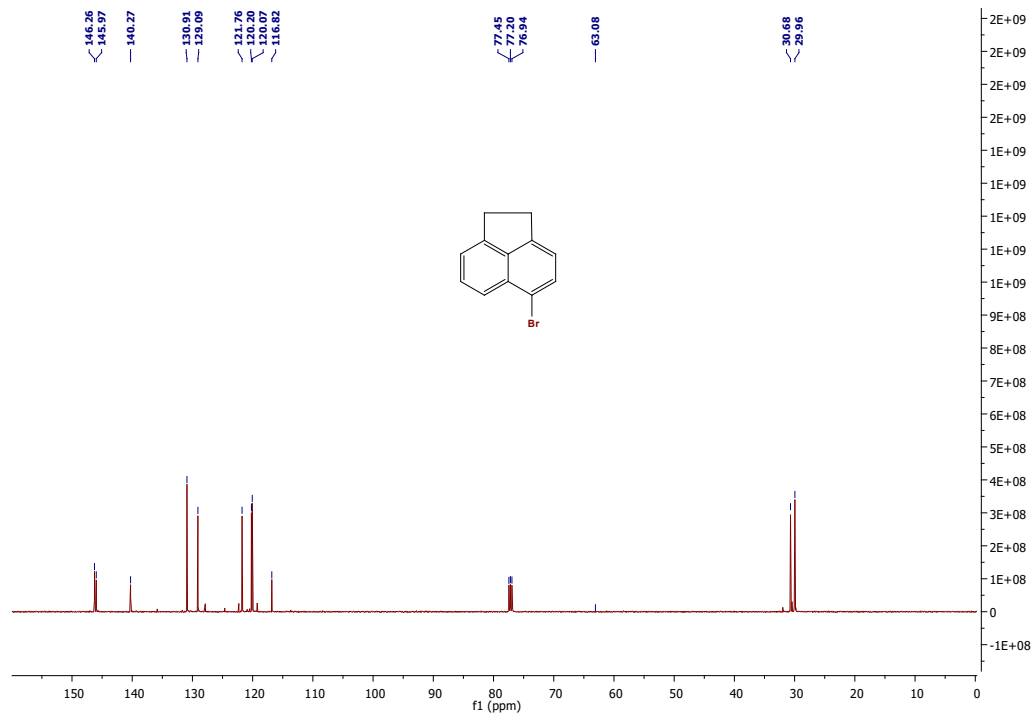

Figure S12. <sup>13</sup>C NMR (126 MHz in CDCl<sub>3</sub>) of compound (11c)

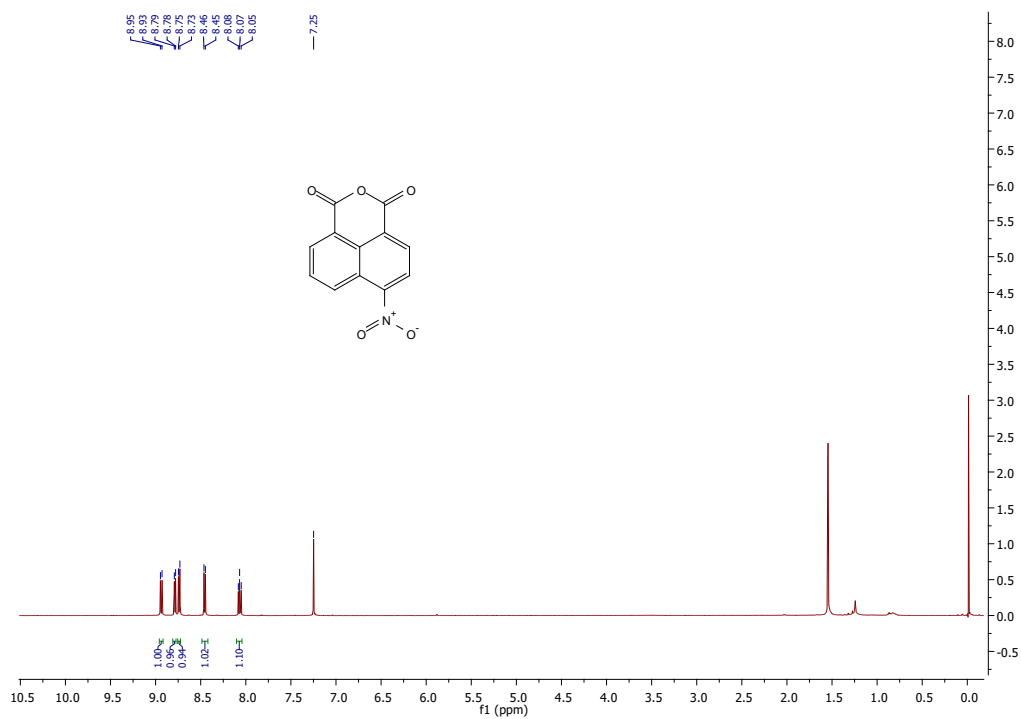

Figure S13.  $^1\text{H}$  NMR (500MHz in  $\text{CDCl}_3$ ) of compound (12a)

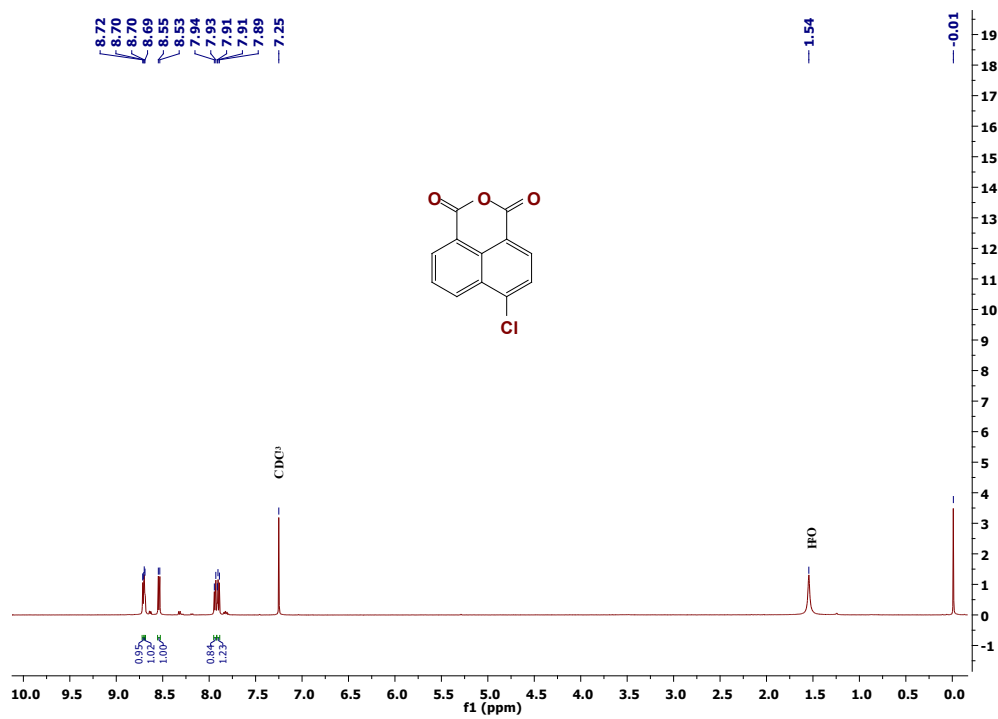

Figure S14.  $^1\text{H}$  NMR (500MHz in  $\text{CDCl}_3$ ) of compound (12b)

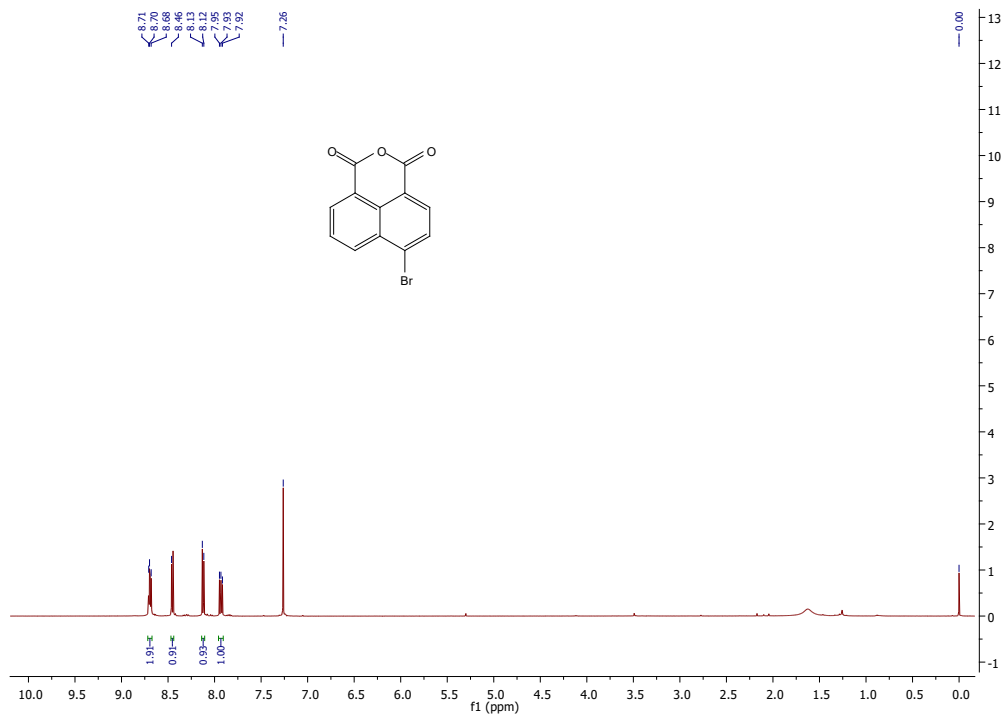

Figure S15.  $^1\text{H}$  NMR (500MHz in  $\text{CDCl}_3$ ) of compound (12c)

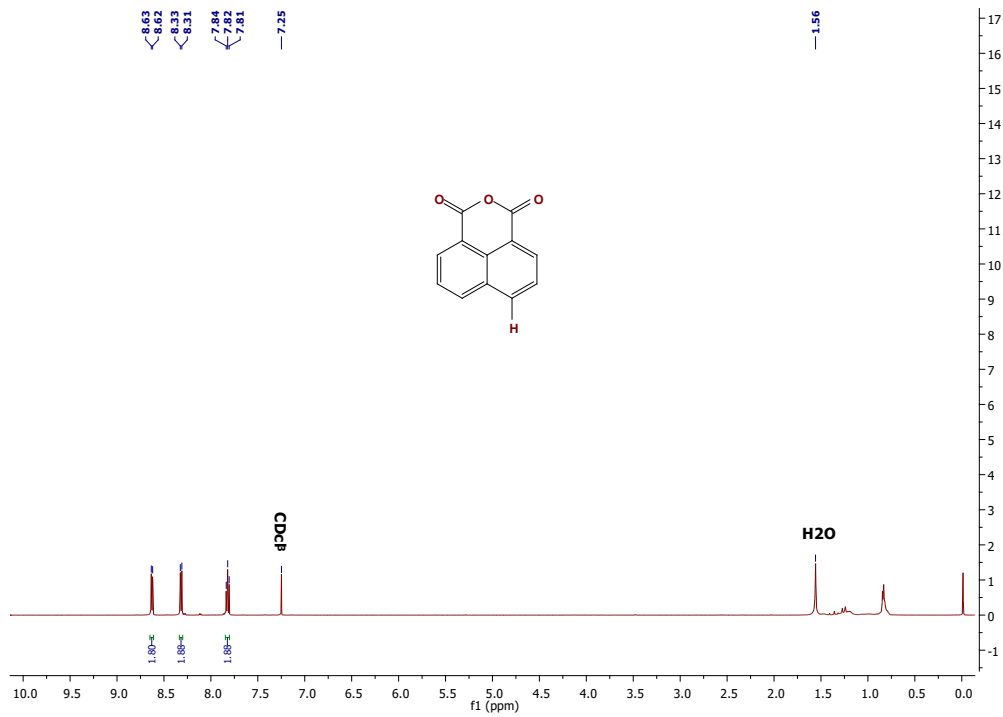

Figure S16.  $^1\text{H}$  NMR (500MHz in  $\text{CDCl}_3$ ) of compound (12d)

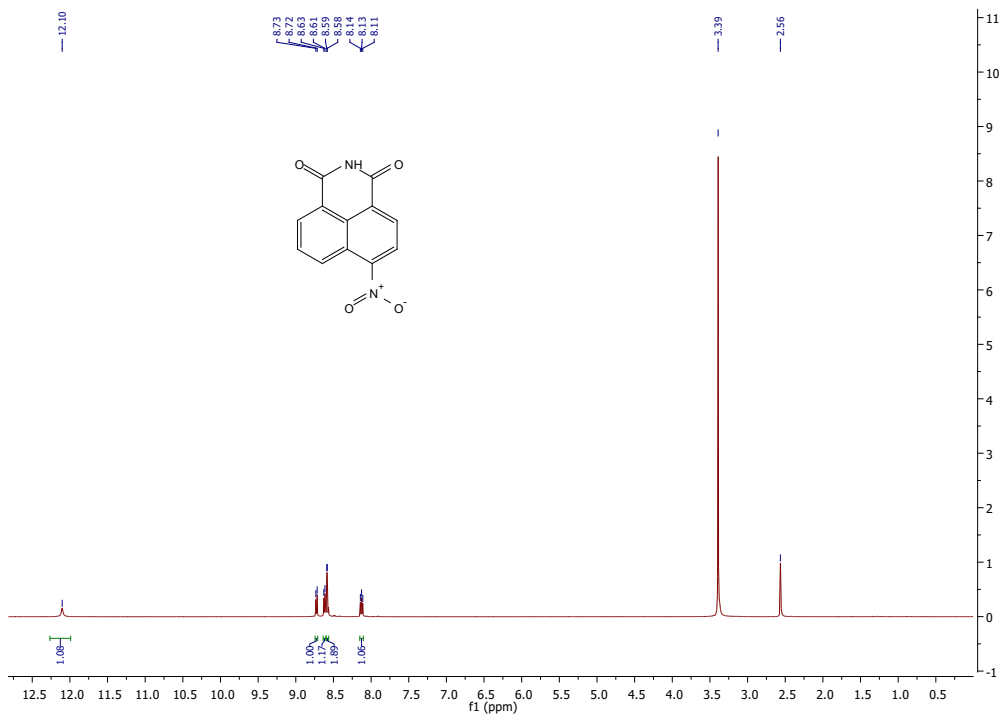

Figure S17.  $^1\text{H}$  NMR (500MHz in  $\text{DMSO-}d_6$ ) of compound (13a)

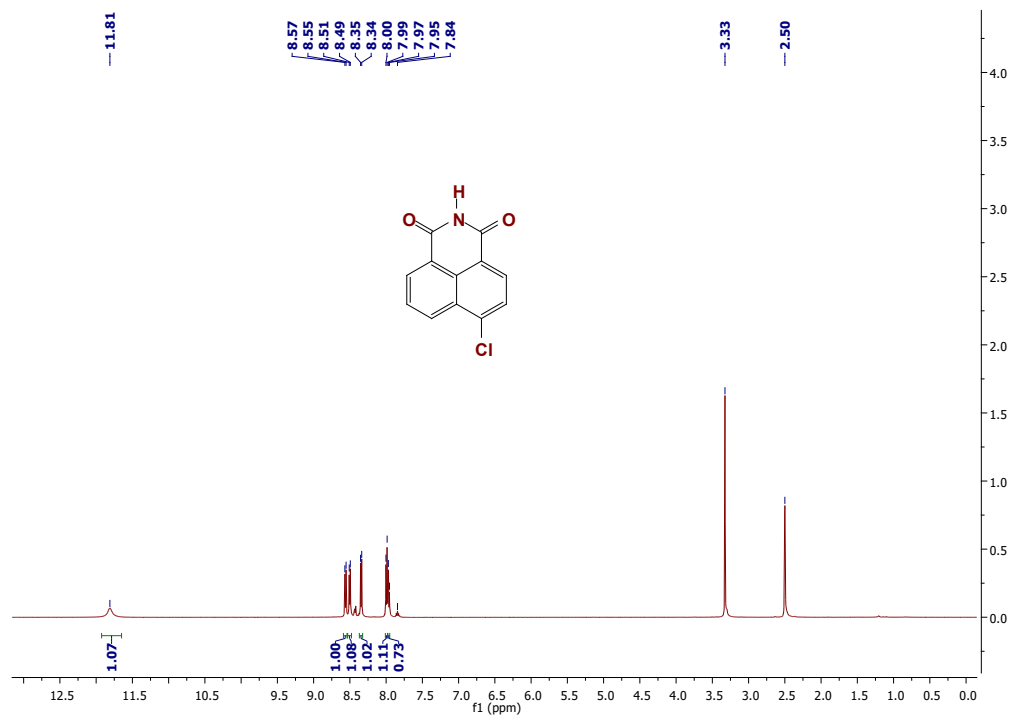

Figure S18.  $^1\text{H}$  NMR (500MHz in  $\text{DMSO-}d_6$ ) of compound (13b)

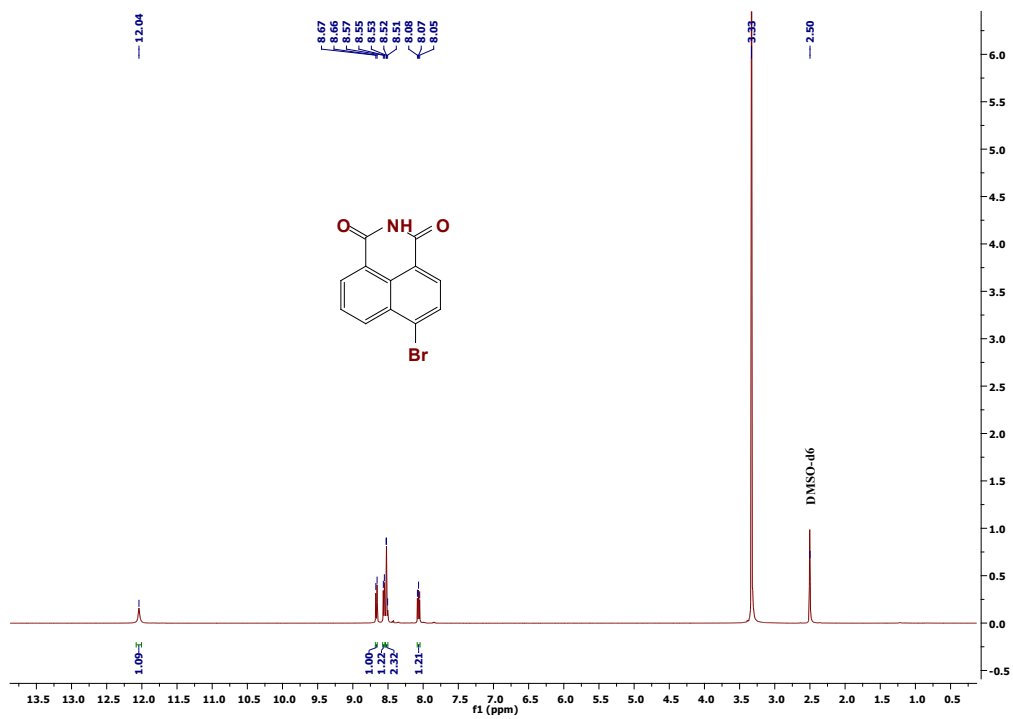

Figure S19.  $^1\text{H}$  NMR (500MHz  $\text{DMSO-}d_6$ ) of compound (13c)

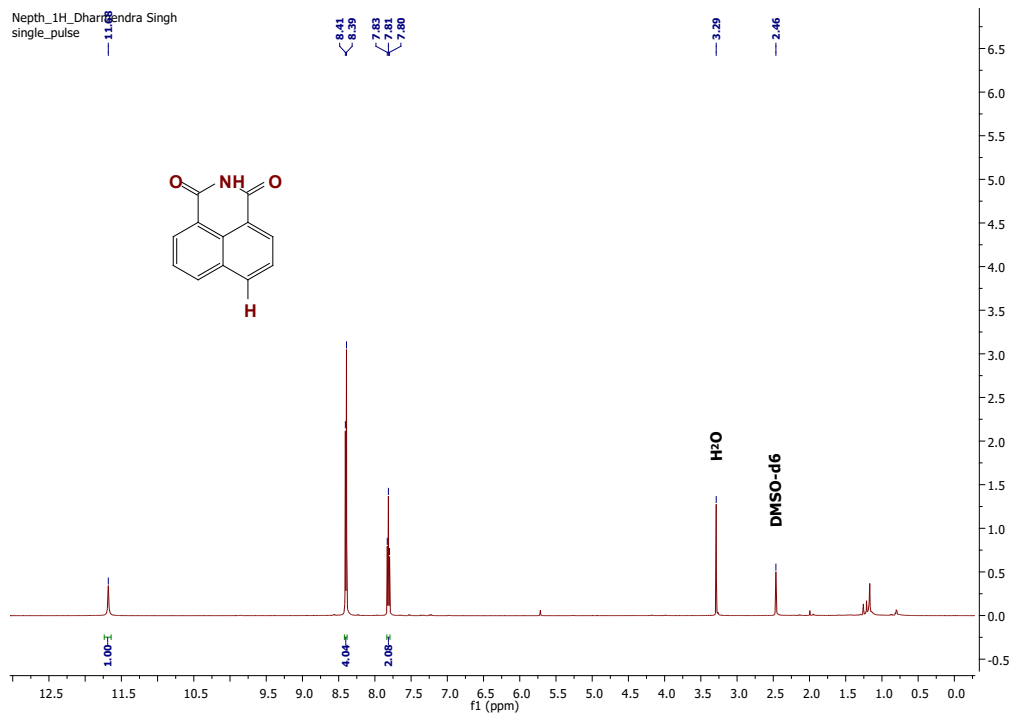

Figure S20.  $^1\text{H}$  NMR (500MHz in  $\text{DMSO-}d_6$ ) of compound (13d)

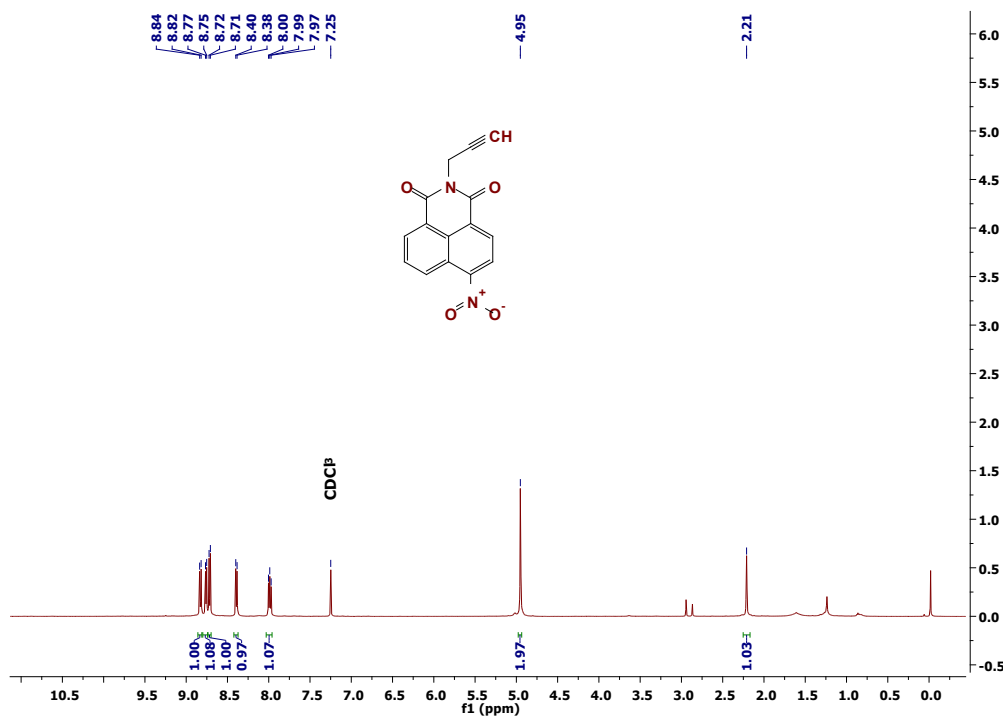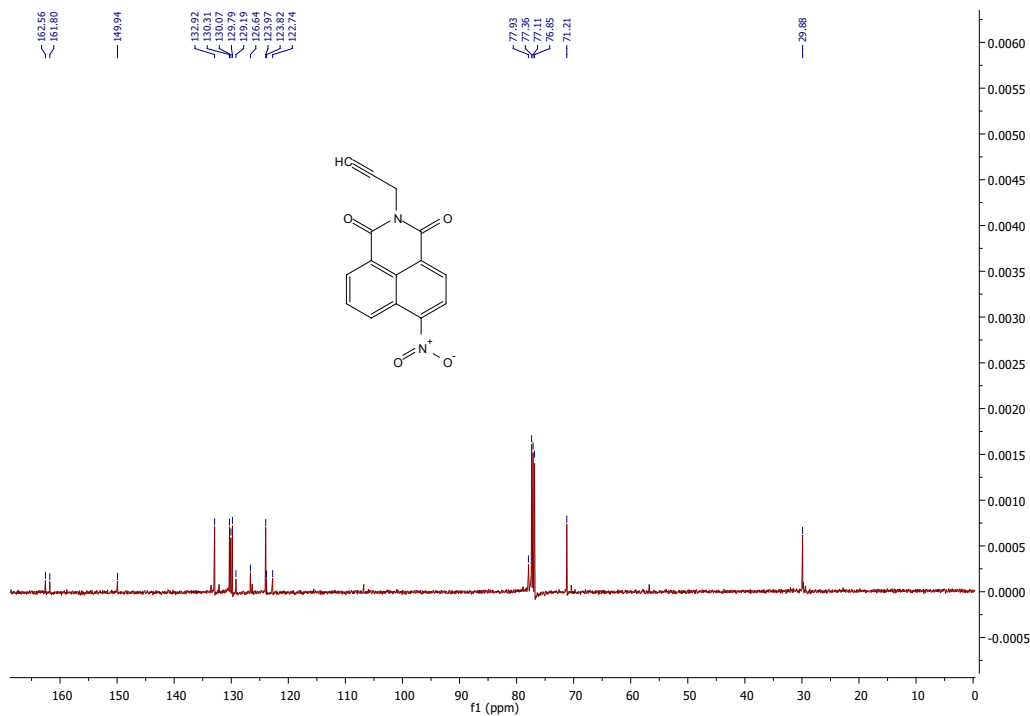

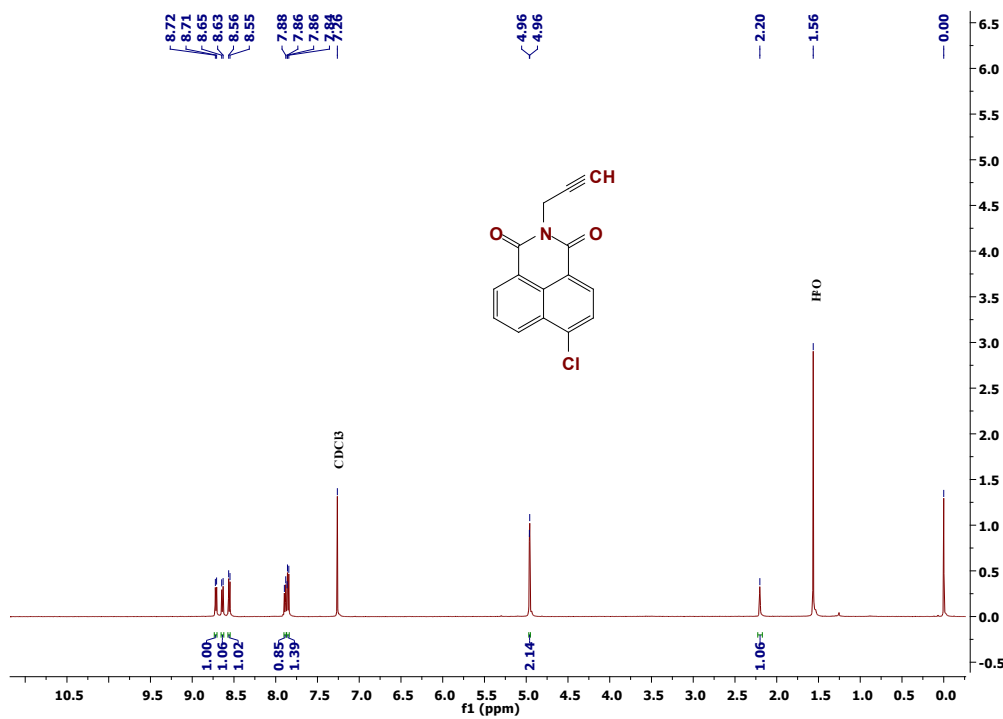

Figure S23.  $^1\text{H}$  NMR (500MHz in  $\text{CDCl}_3$ ) of compound (14b)

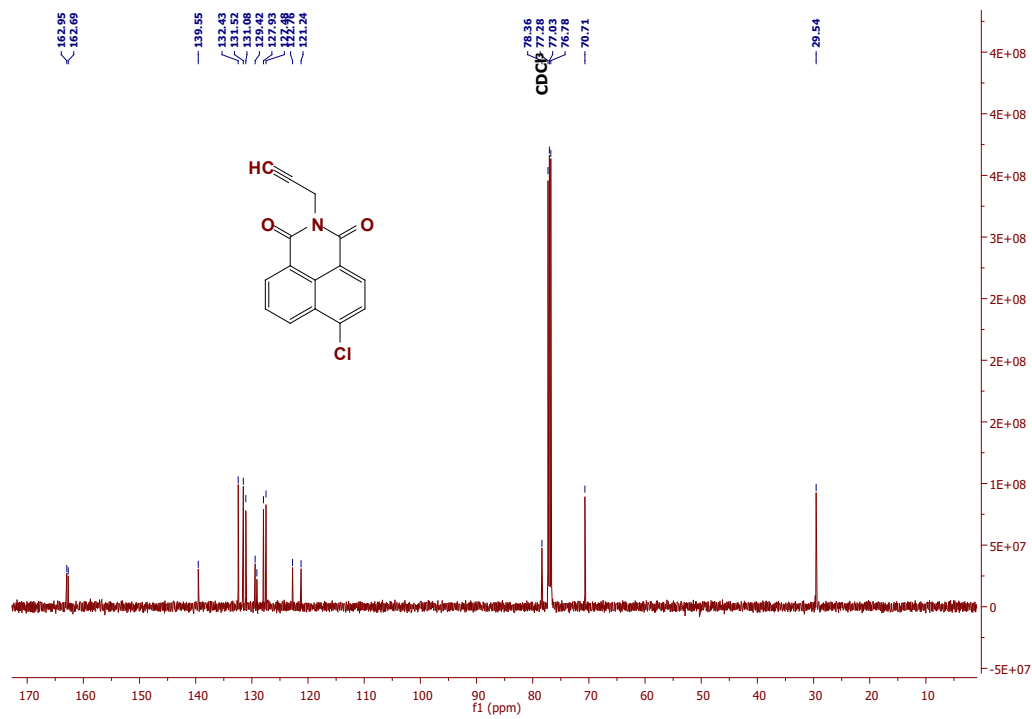

Figure S24.  $^{13}\text{C}$  NMR (126 MHz in  $\text{CDCl}_3$ ) of compound (14b)

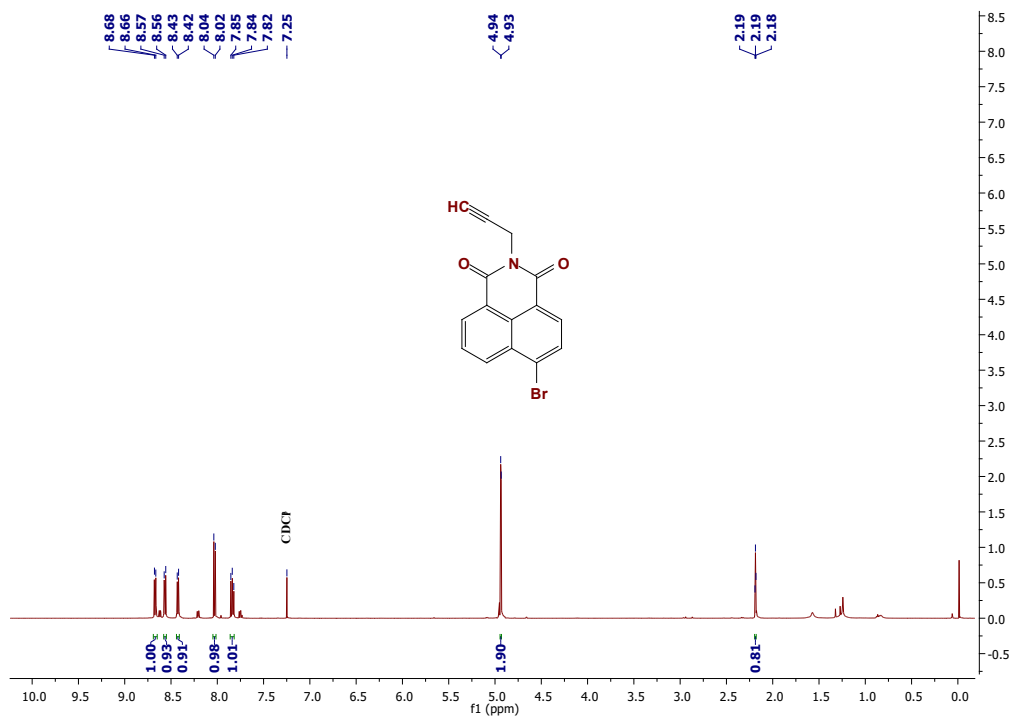

Figure S25. <sup>1</sup>H NMR (500MHz in CDCl<sub>3</sub>) of compound (14c)

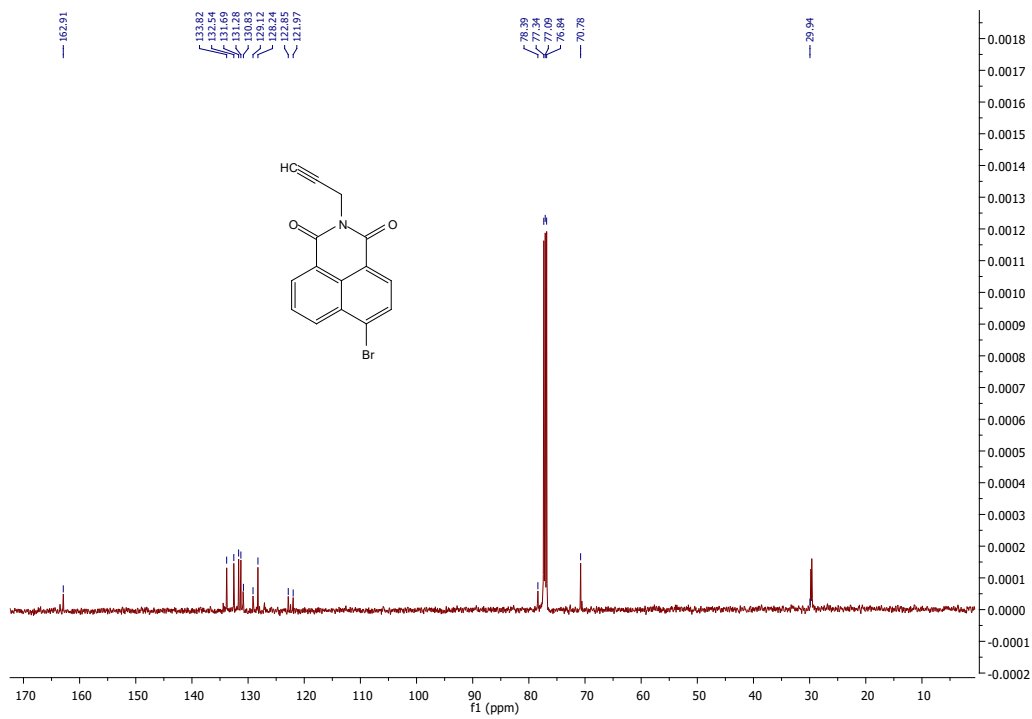

Figure S26. <sup>13</sup>C NMR (126 MHz in CDCl<sub>3</sub>) of compound (14c)

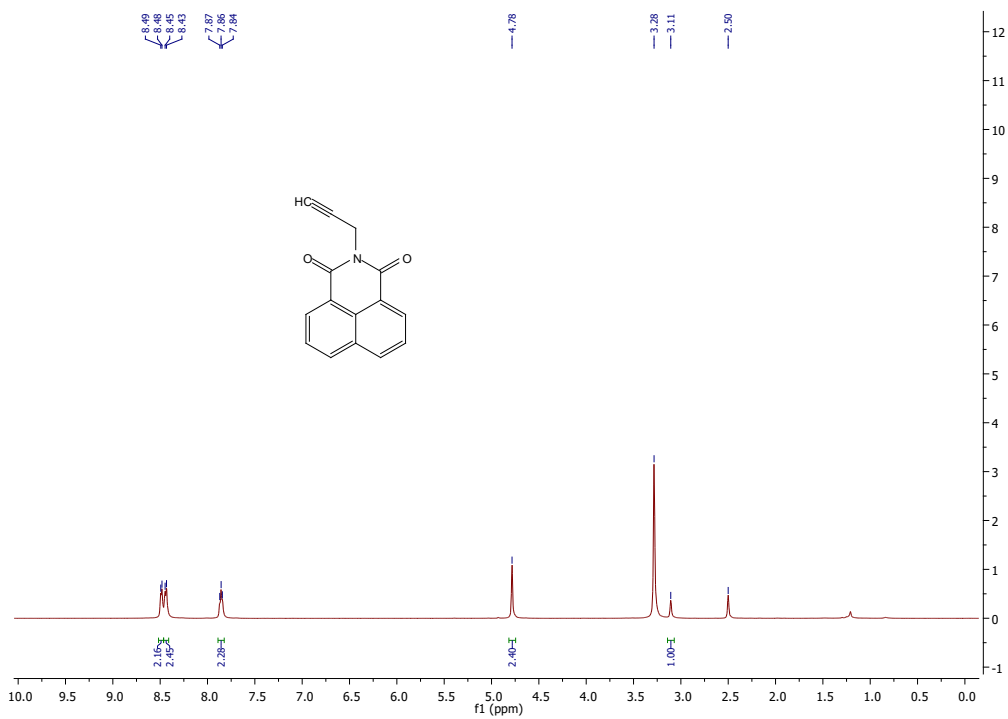

Figure S27. <sup>1</sup>H NMR (500MHz in DMSO-*d*<sub>6</sub>) of compound (14d)

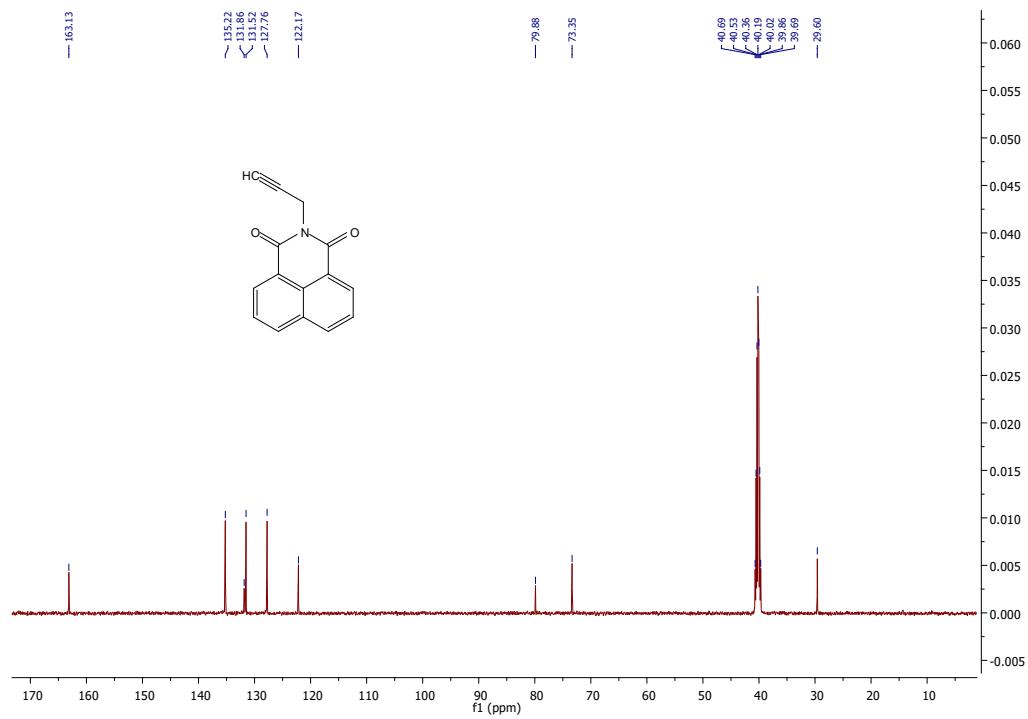

Figure S28. <sup>13</sup>C NMR (126 MHz in DMSO-*d*<sub>6</sub>) of compound (14d)

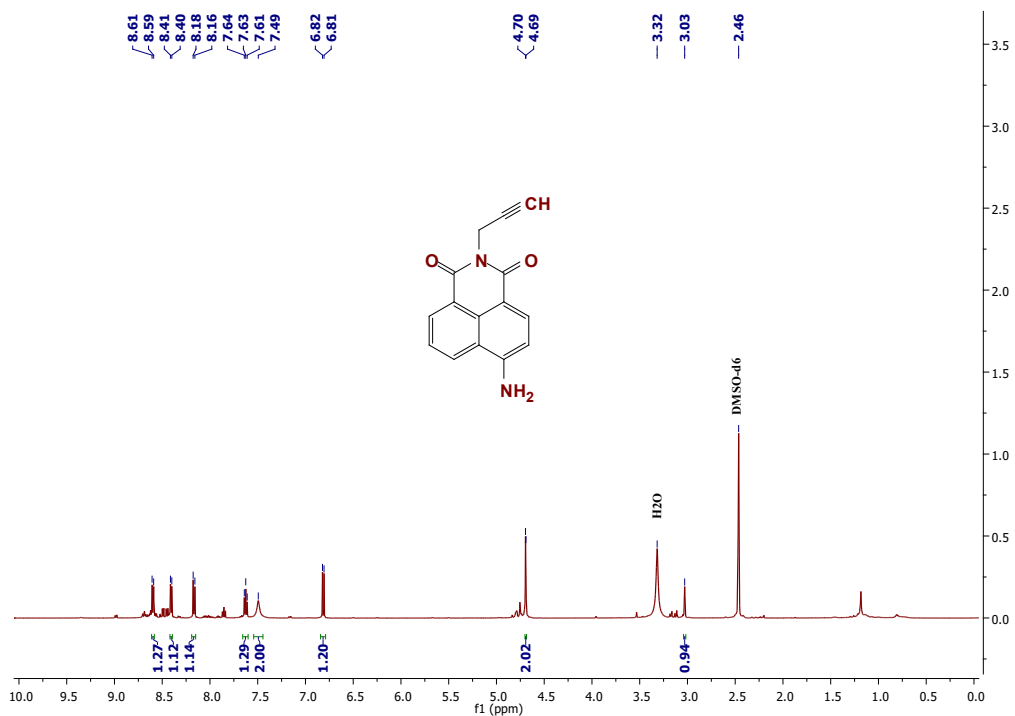

Figure S29.  $^1\text{H}$  NMR (500MHz in  $\text{DMSO-}d_6$ ) of compound (15a)

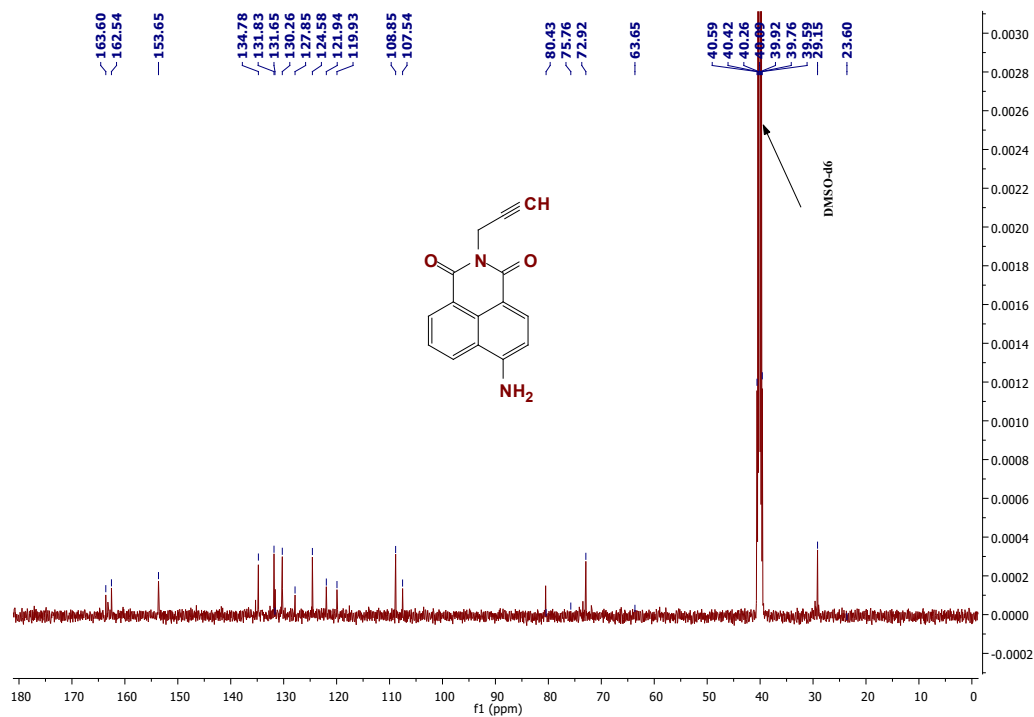

Figure S30.  $^{13}\text{C}$  NMR (126 MHz in  $\text{DMSO-}d_6$ ) of compound (15a)



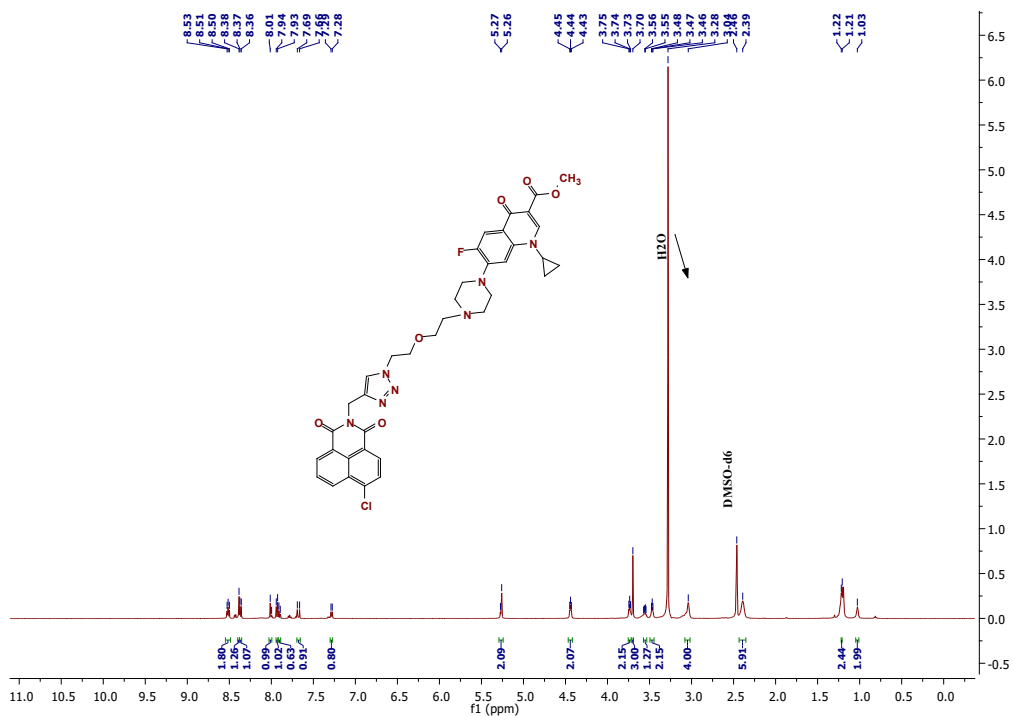

Figure S33.  $^1\text{H}$  NMR (500MHz in  $\text{DMSO-}d_6$ ) of compound (17b)

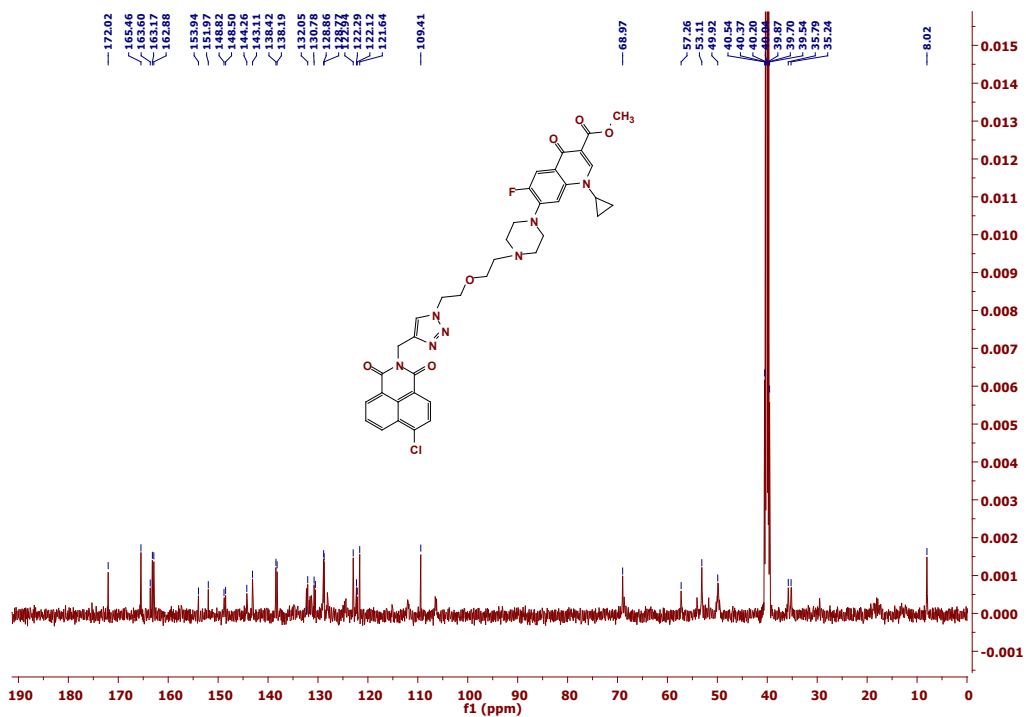

Figure S34.  $^{13}\text{C}$  NMR (126 MHz in  $\text{DMSO-}d_6$ ) of compound (17b)

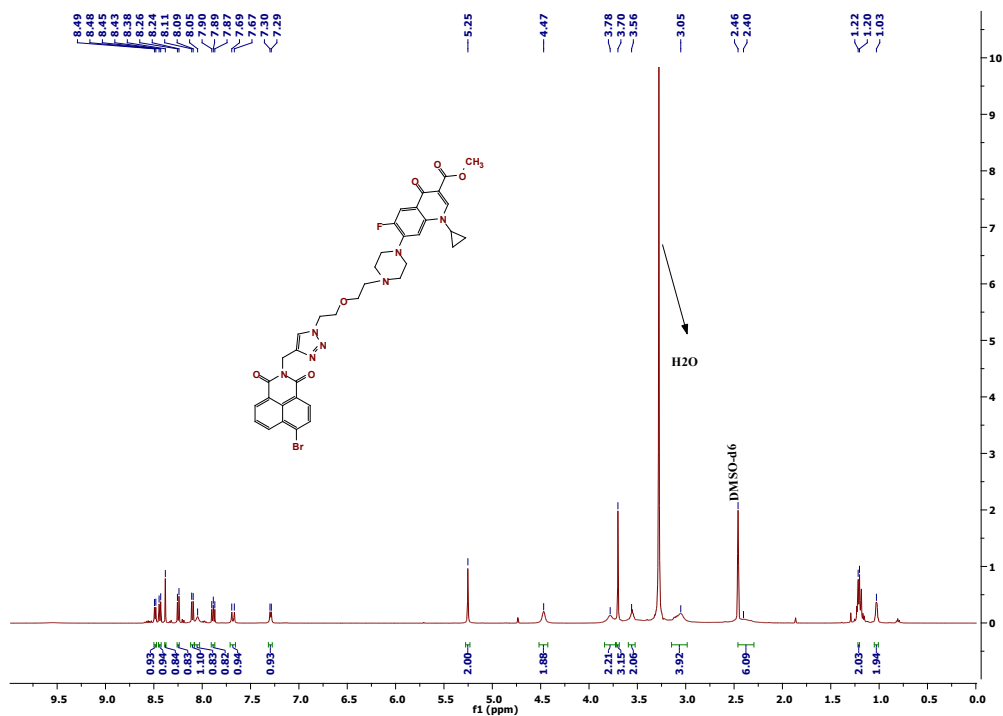

Figure S35.  $^1\text{H}$  NMR (500MHz in  $\text{DMSO-}d_6$ ) of compound (17c)

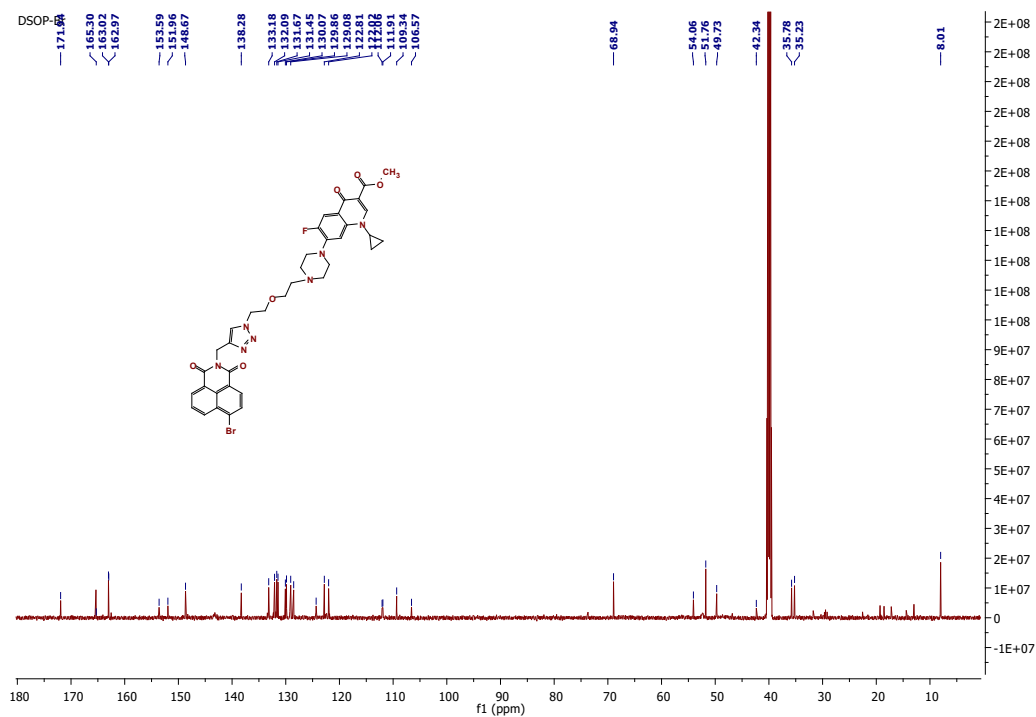

Figure S36.  $^{13}\text{C}$  NMR (126 MHz in  $\text{DMSO-}d_6$ ) of compound (17c)

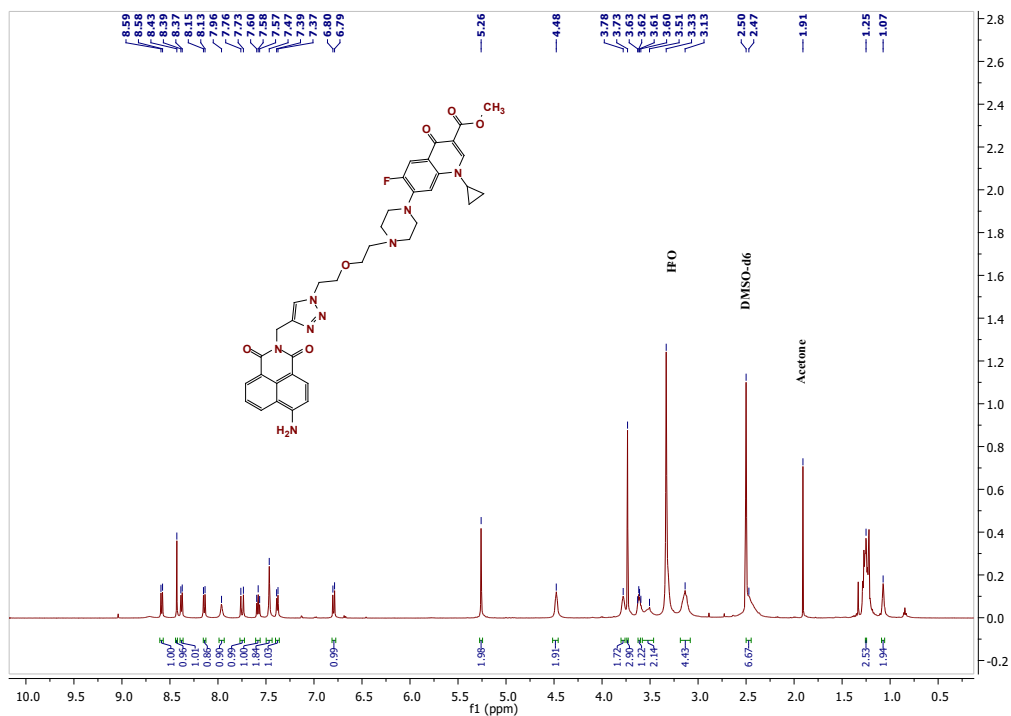

Figure S37. <sup>1</sup>H NMR (500MHz in DMSO-*d*<sub>6</sub>) of compound (17d)

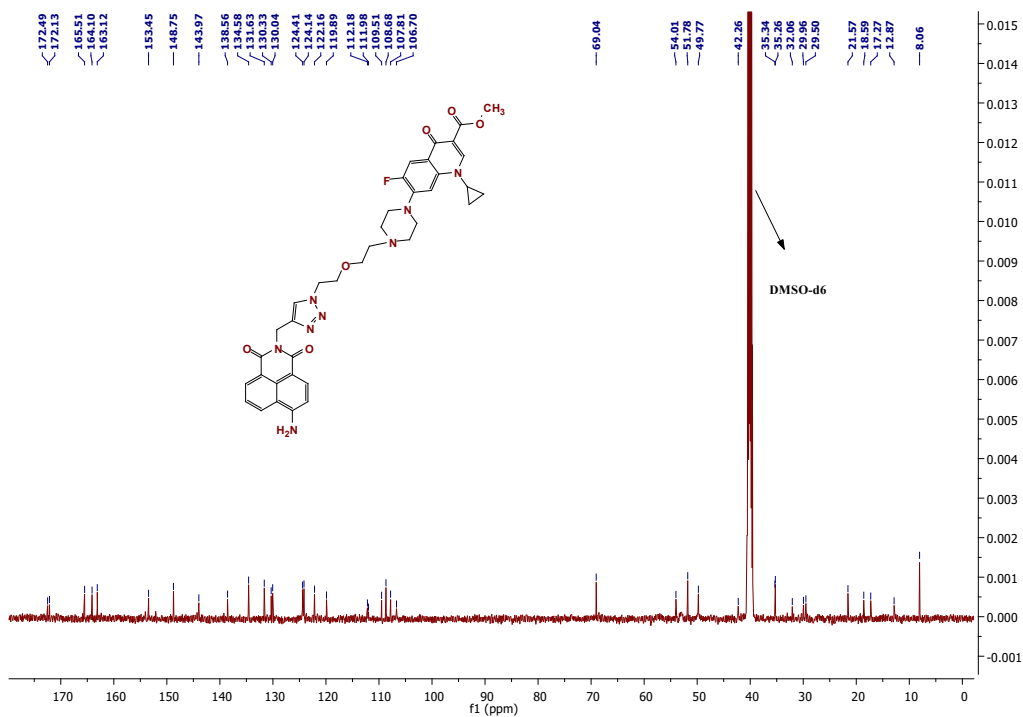

Figure S38. <sup>13</sup>C NMR (126 MHz in DMSO-*d*<sub>6</sub>) of Compound (17d)

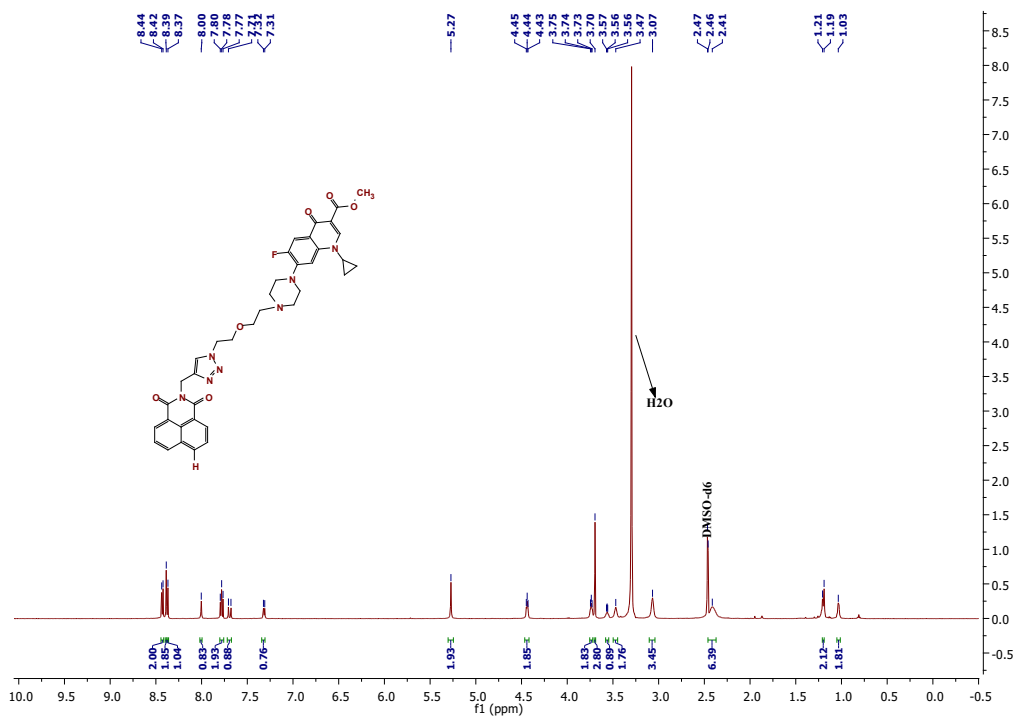

Figure S39.  $^1\text{H}$  NMR (500MHz in  $\text{DMSO}-d_6$ ) of compound (17e)

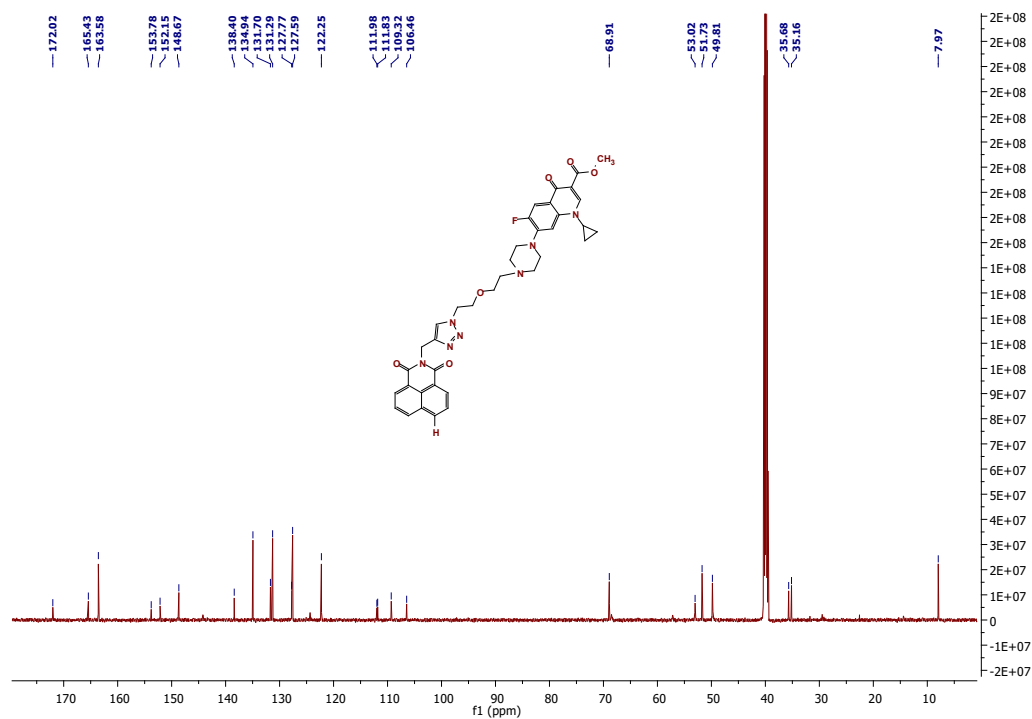

Figure S40.  $^{13}\text{C}$  NMR (126 MHz in  $\text{DMSO}-d_6$ ) of compound (17e)

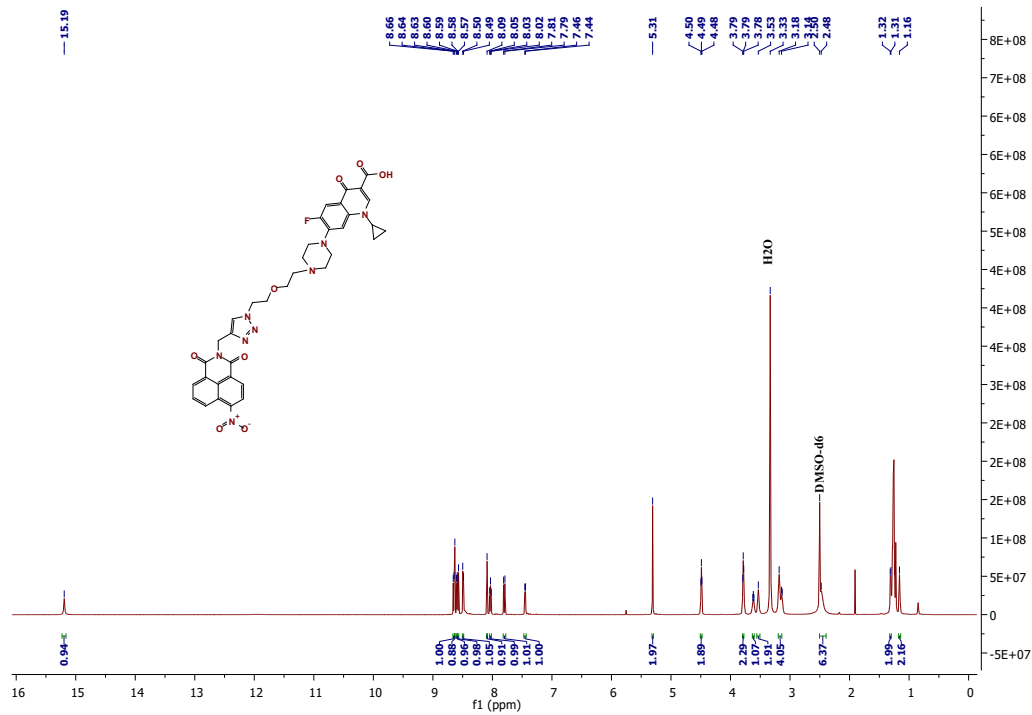

Figure S41.  $^1\text{H}$  NMR (500MHz in  $\text{DMSO-}d_6$ ) of compound (18a)

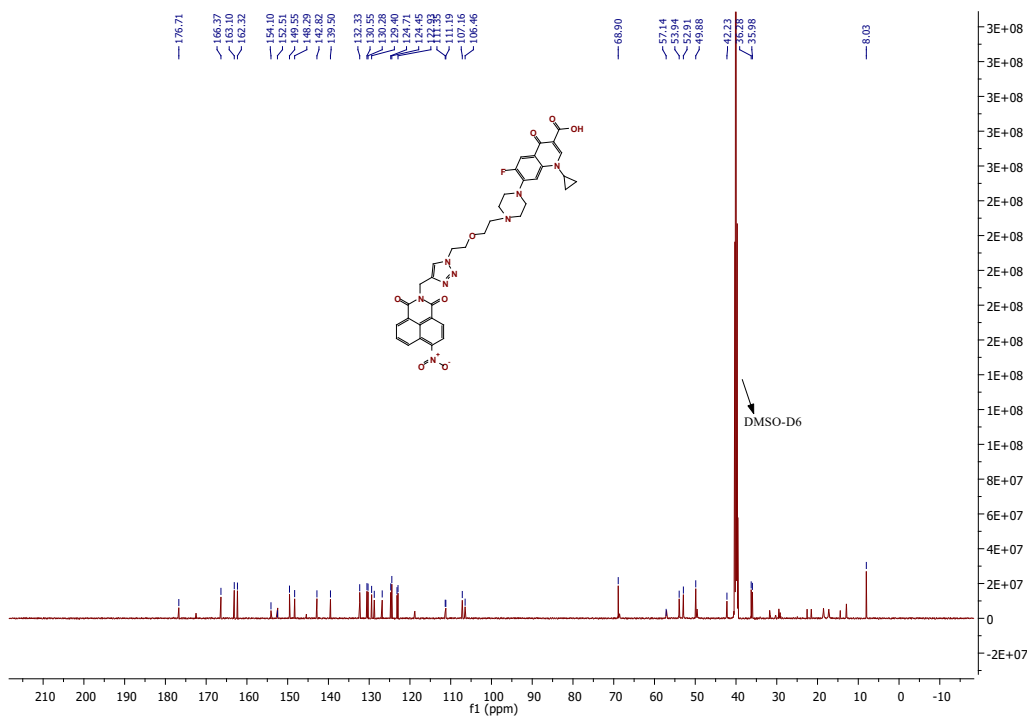

Figure S42.  $^{13}\text{C}$  NMR (126 MHz in  $\text{DMSO-}d_6$ ) of compound (18a)

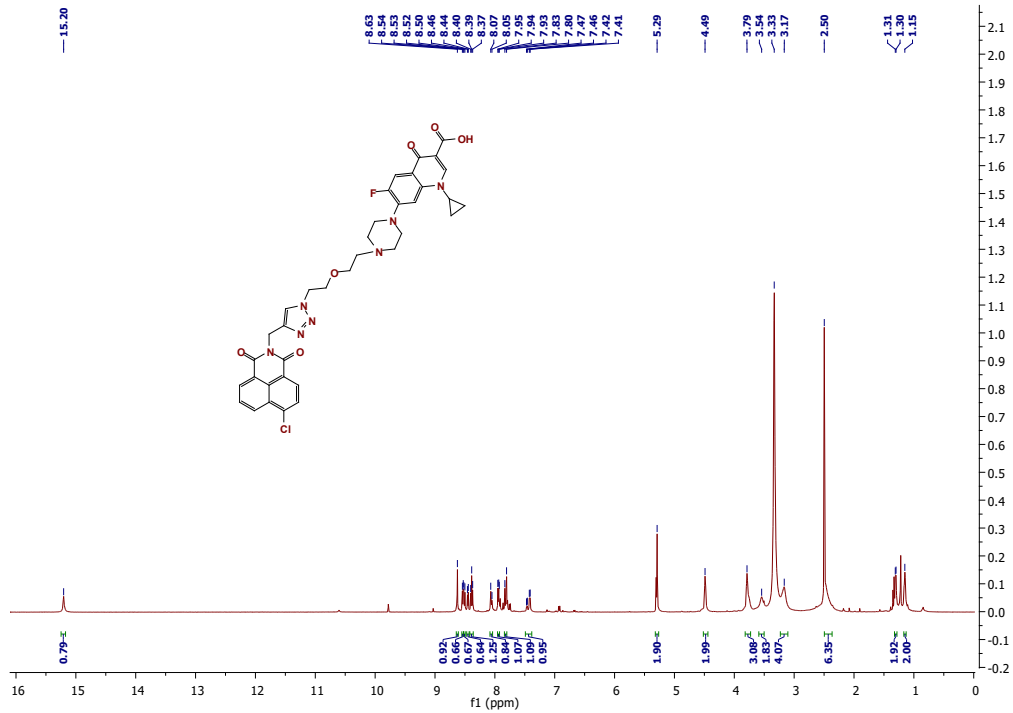

Figure S43. <sup>1</sup>H NMR (500MHz in DMSO-*d*<sub>6</sub>) of compound (18b)

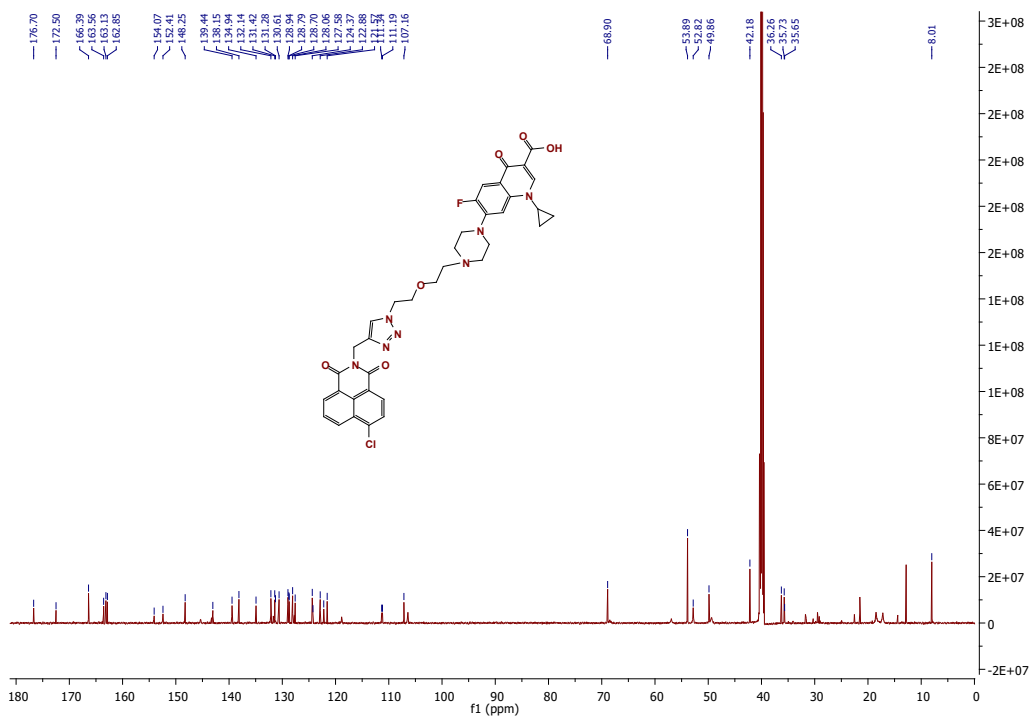

Figure S44. <sup>13</sup>C NMR (151 MHz in DMSO-*d*<sub>6</sub>) of compound (18b)

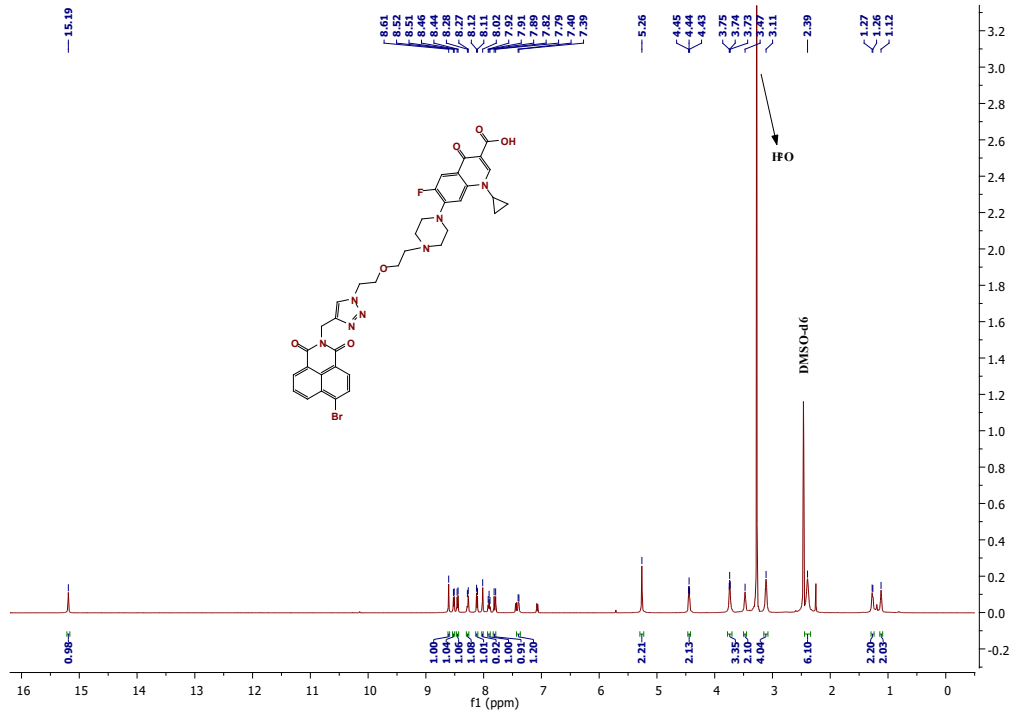

Figure S45.  $^1\text{H}$  NMR (500MHz in  $\text{DMSO-}d_6$ ) of compound (18c)

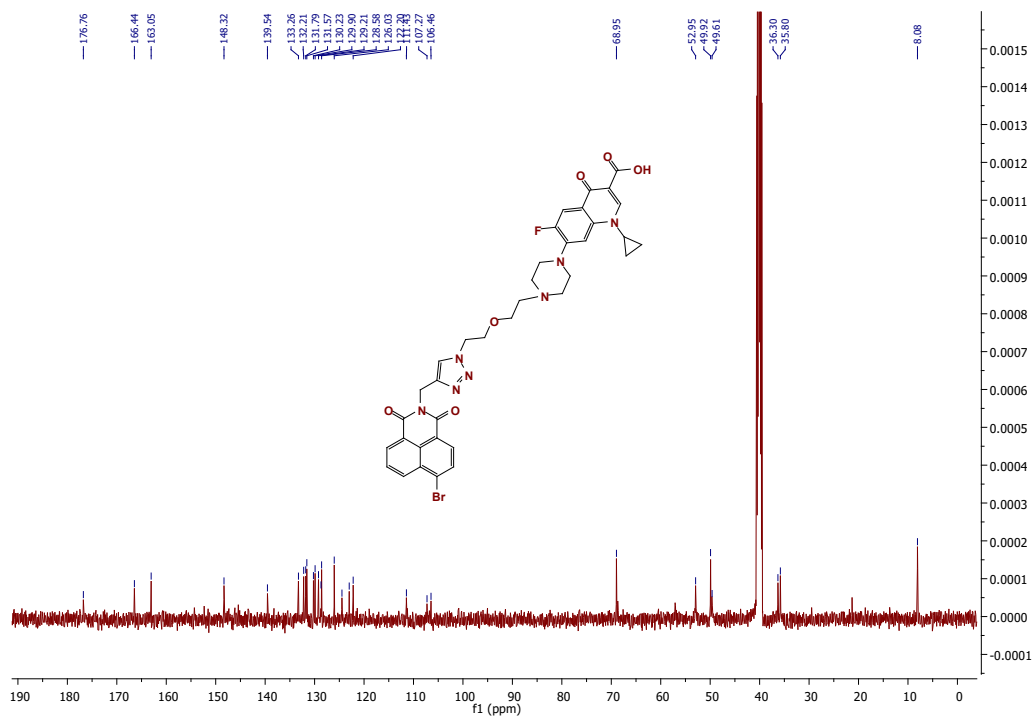

Figure S46.  $^{13}\text{C}$  NMR (126 MHz in  $\text{DMSO-}d_6$ ) of compound (18c)

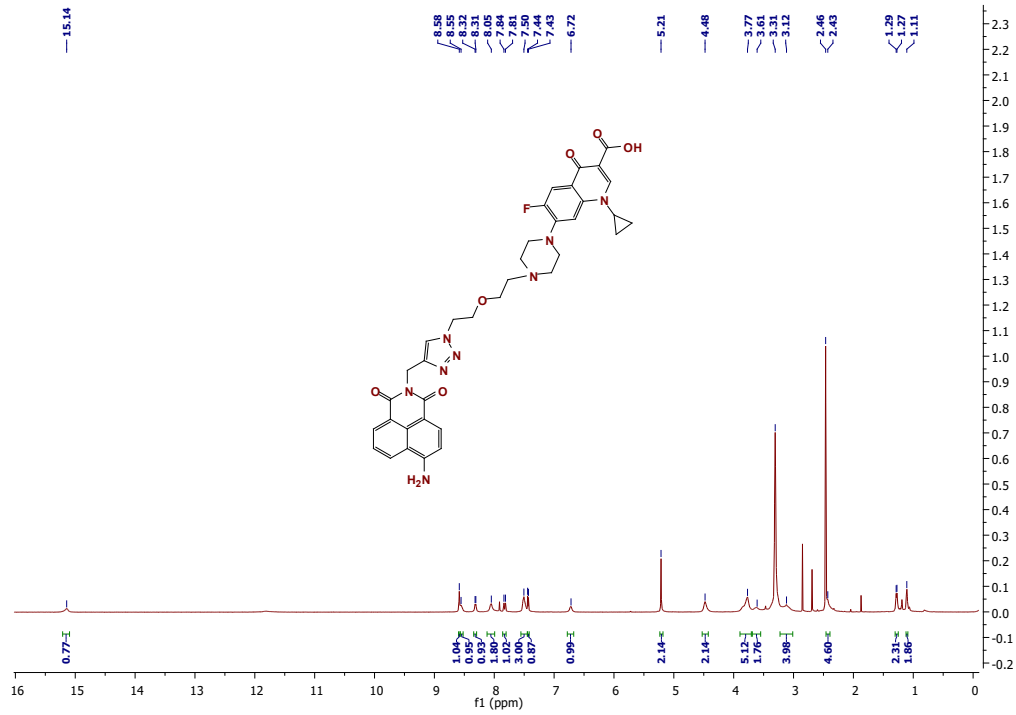

Figure S47.  $^1\text{H}$  NMR (500MHz in  $\text{DMSO}-d_6$ ) of compound (18d)

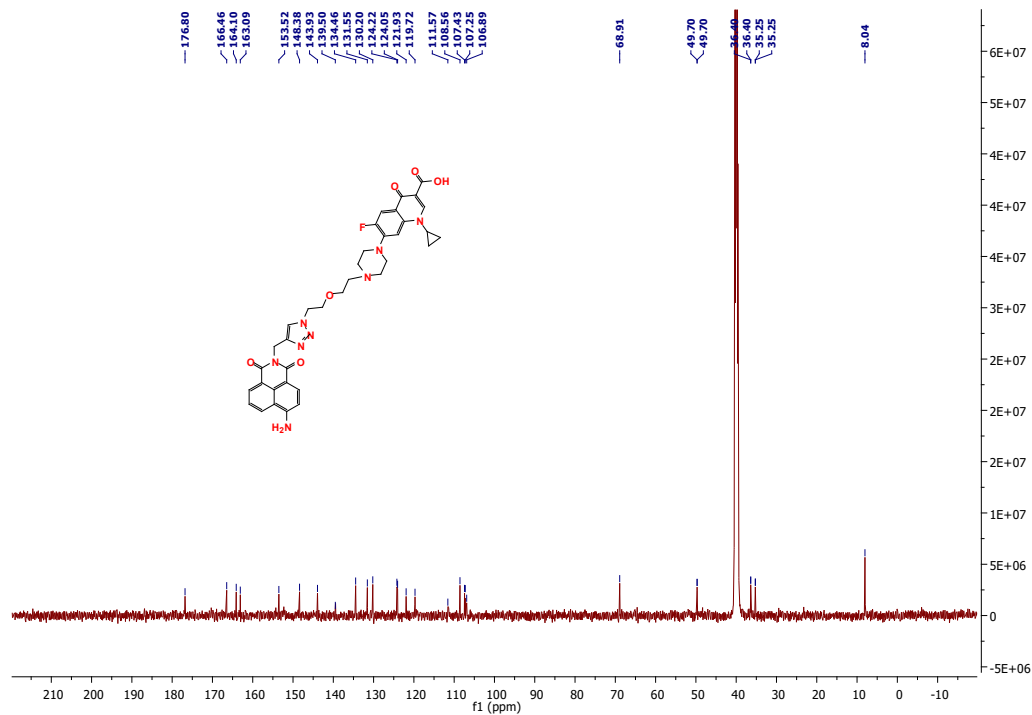

Figure S48.  $^{13}\text{C}$  NMR (126 MHz in  $\text{DMSO}-d_6$ ) of compound (18d)

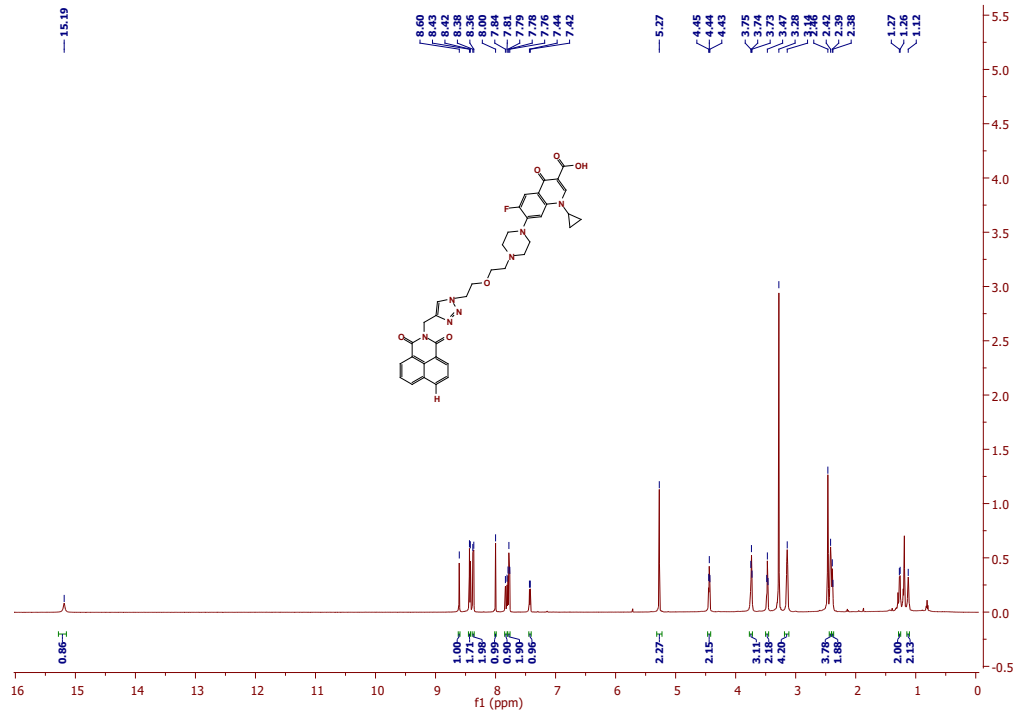

Figure S49.  $^1\text{H}$  NMR (500MHz in  $\text{DMSO-}d_6$ ) of compound (18e)

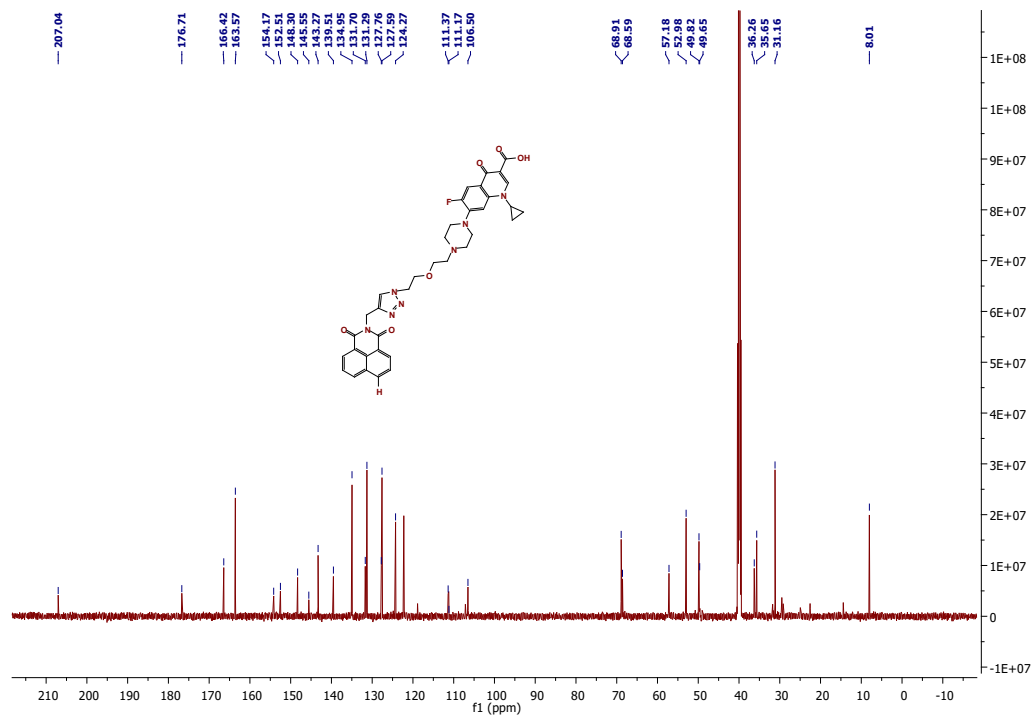

Figure S50.  $^{13}\text{C}$  NMR (151 MHz in  $\text{DMSO-}d_6$ ) of compound (18e)

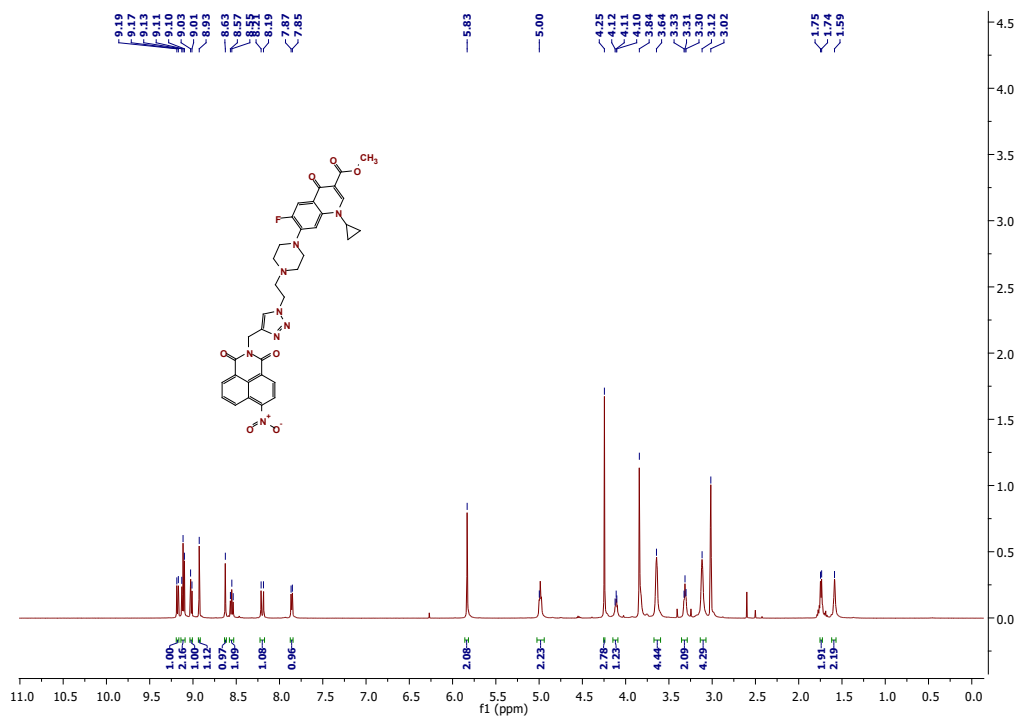

Figure S51.  $^1\text{H}$  NMR (500MHz in  $\text{DMSO-}d_6$ ) of compound (19a)

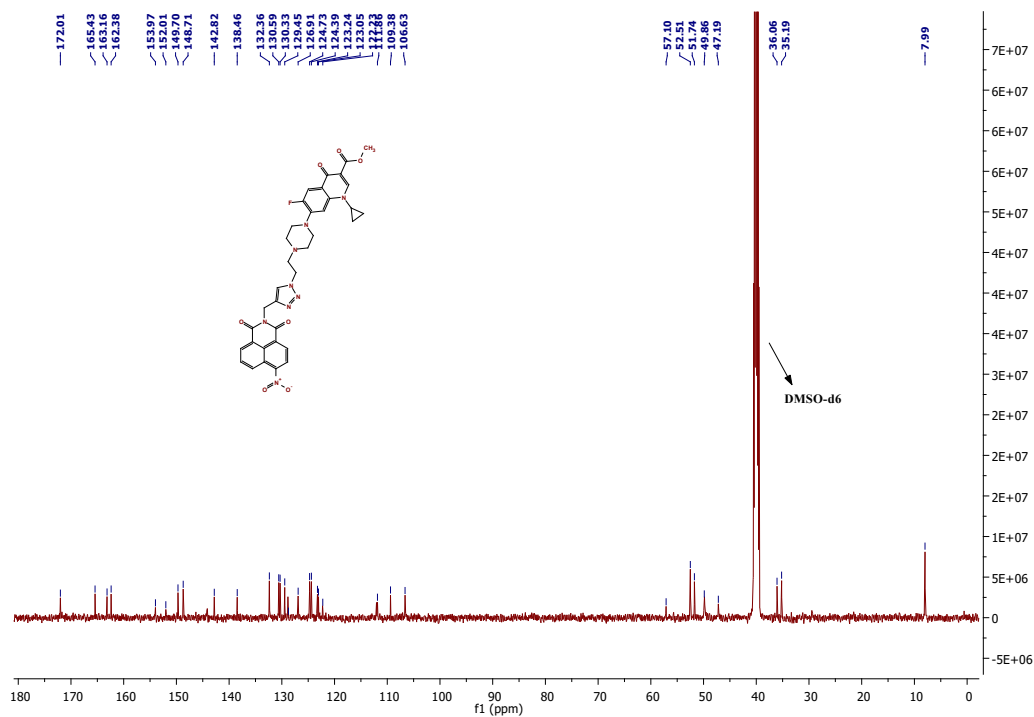

Figure S52.  $^{13}\text{C}$  NMR (126 MHz in  $\text{DMSO-}d_6$ ) of compound (19a)

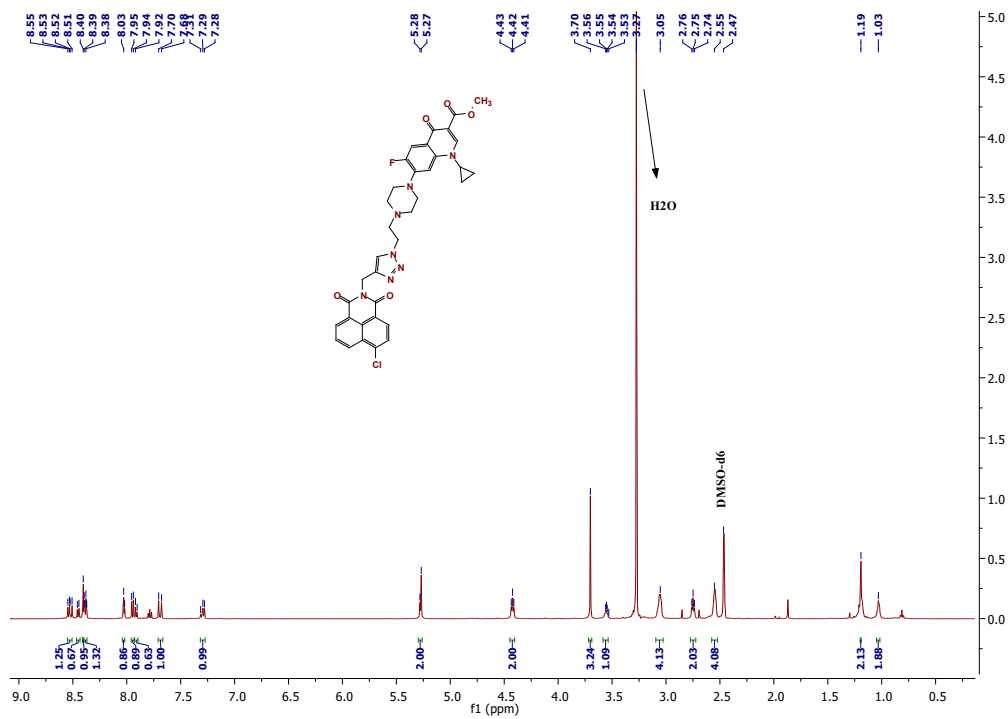

Figure S53.  $^1\text{H}$  NMR (500MHz in  $\text{DMSO}-d_6$ ) of compound (19b)

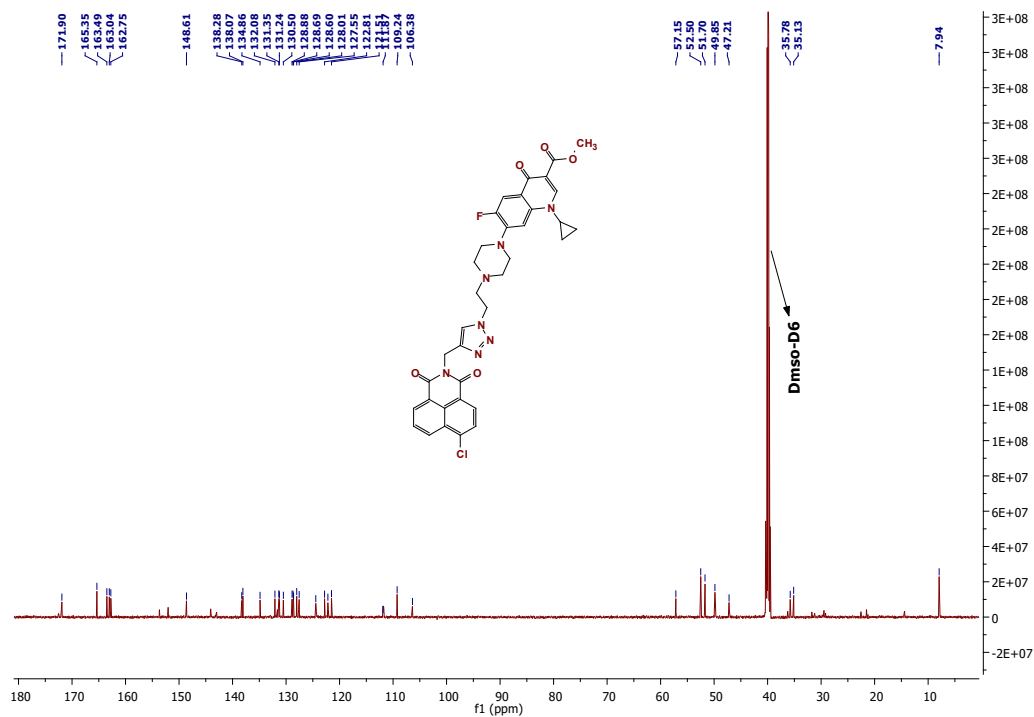

Figure S54.  $^{13}\text{C}$  NMR (151 MHz in  $\text{DMSO}-d_6$ ) of compound (19b)

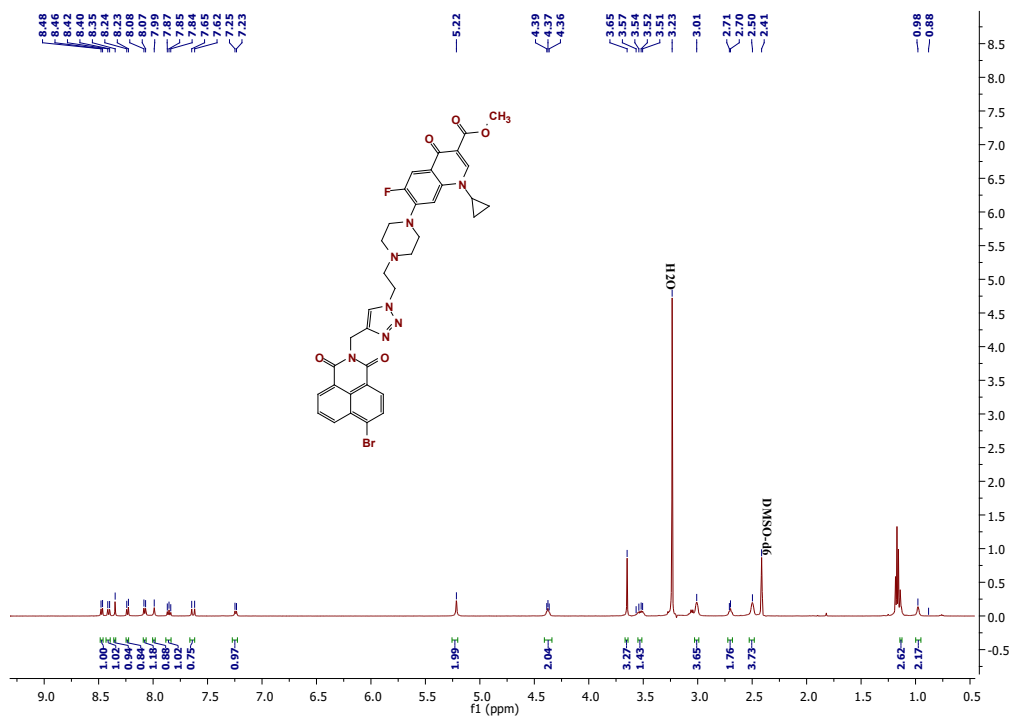

Figure S55.  $^1\text{H}$  NMR (500MHz in  $\text{DMSO-}d_6$ ) of compound (19c)

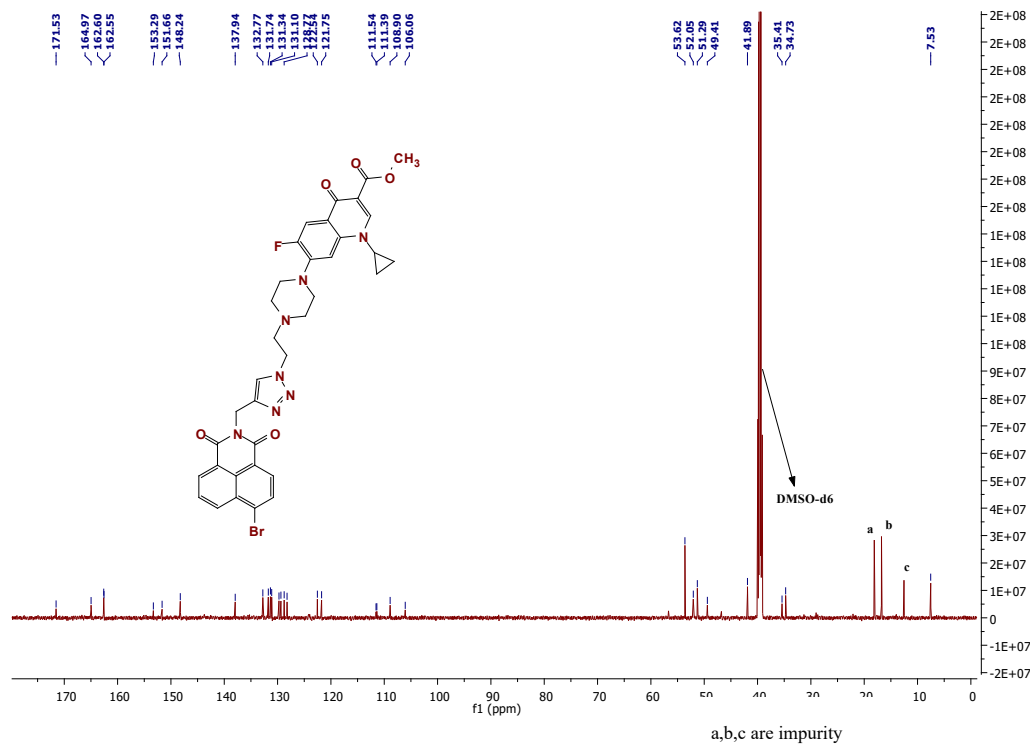

Figure S56.  $^{13}\text{C}$  NMR (151 MHz in  $\text{DMSO-}d_6$ ) of compound (19c)

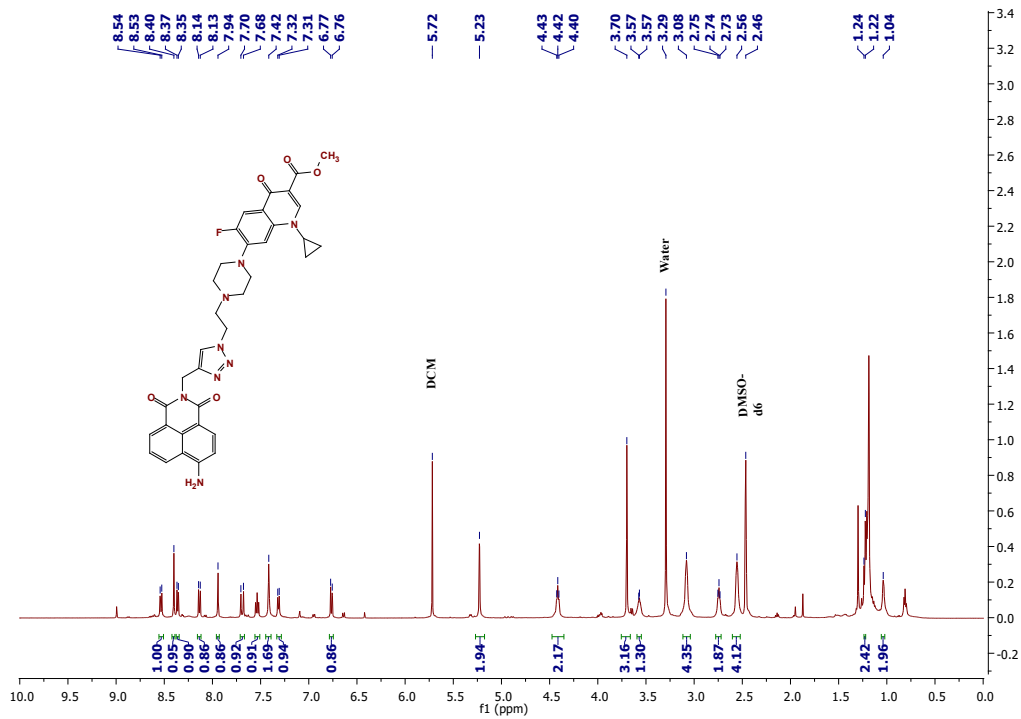

Figure S57.  $^1\text{H}$  NMR (500MHz in  $\text{DMSO-}d_6$ ) of compound (19d)

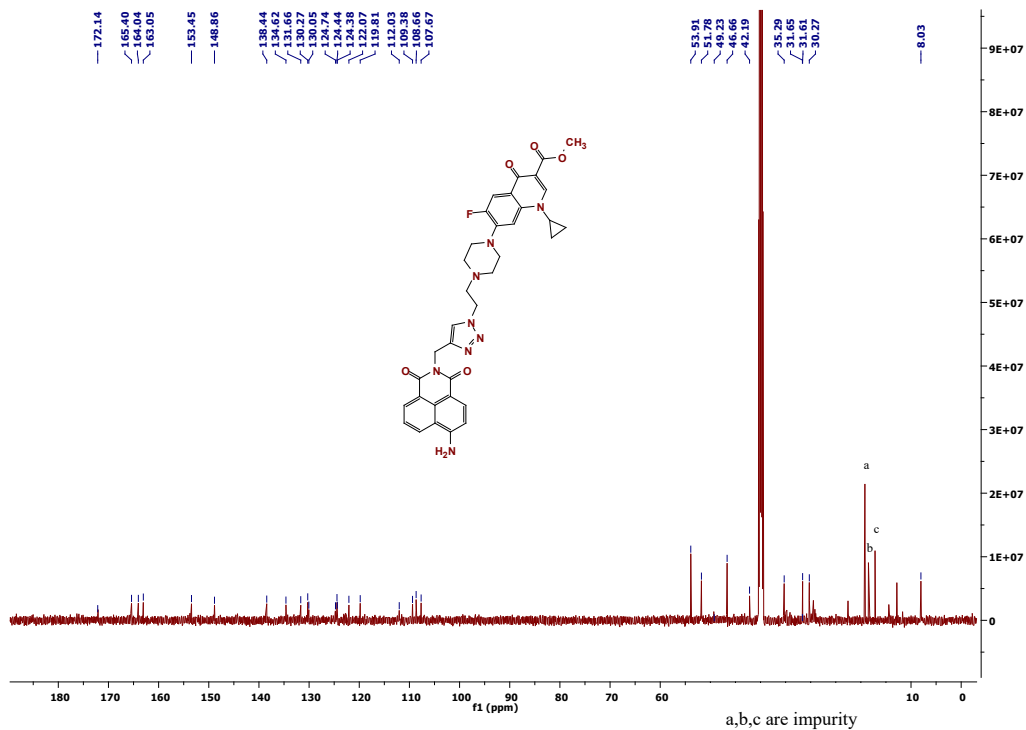

Figure S58.  $^{13}\text{C}$  NMR (151 MHz in  $\text{DMSO-}d_6$ ) of compound (19d)

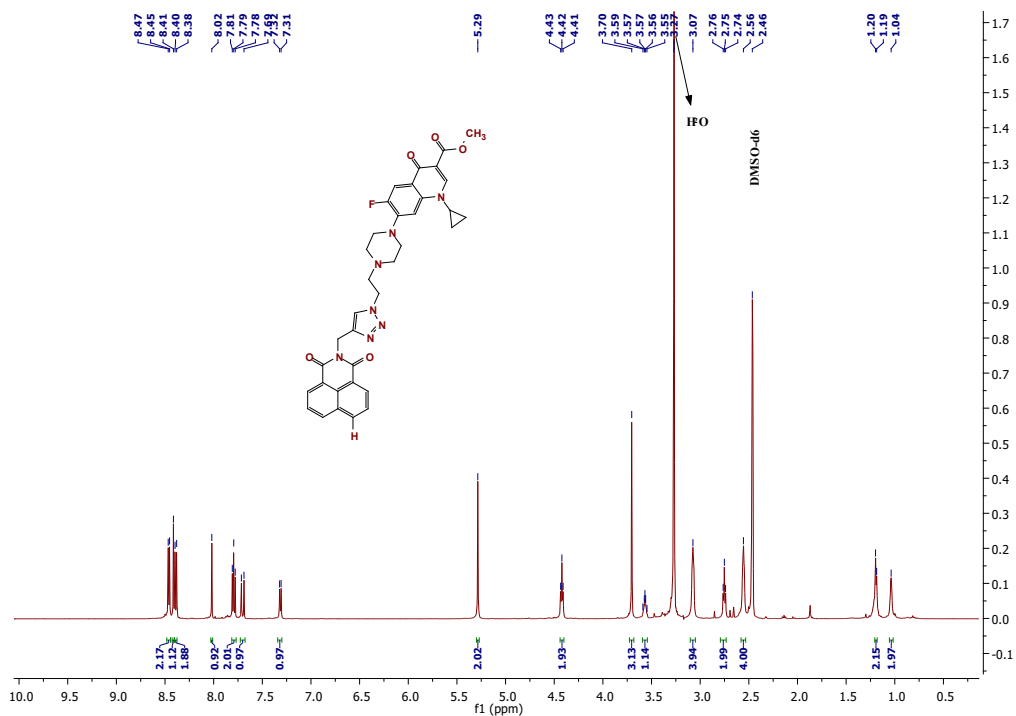

Figure S59.  $^1\text{H}$  NMR (500MHz in  $\text{DMSO-}d_6$ ) of compound (19e)

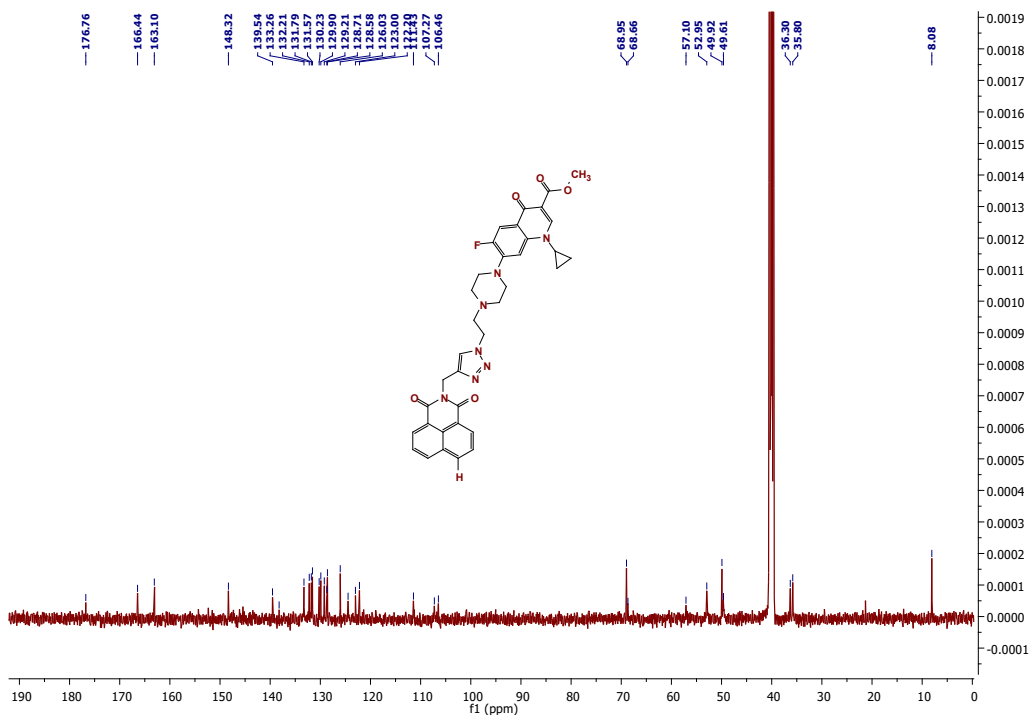

Figure S60.  $^{13}\text{C}$  NMR (126 MHz in  $\text{DMSO-}d_6$ ) of compound (19e)

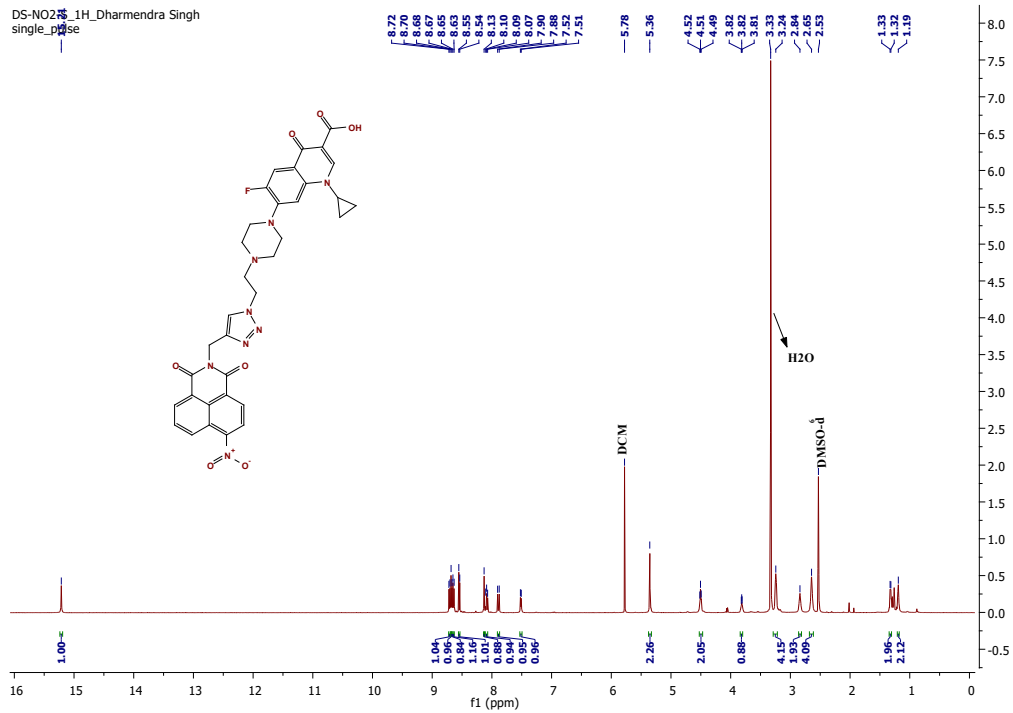

Figure S61.  $^1\text{H}$  NMR (500MHz in  $\text{DMSO}-d_6$ ) of compound (20a)

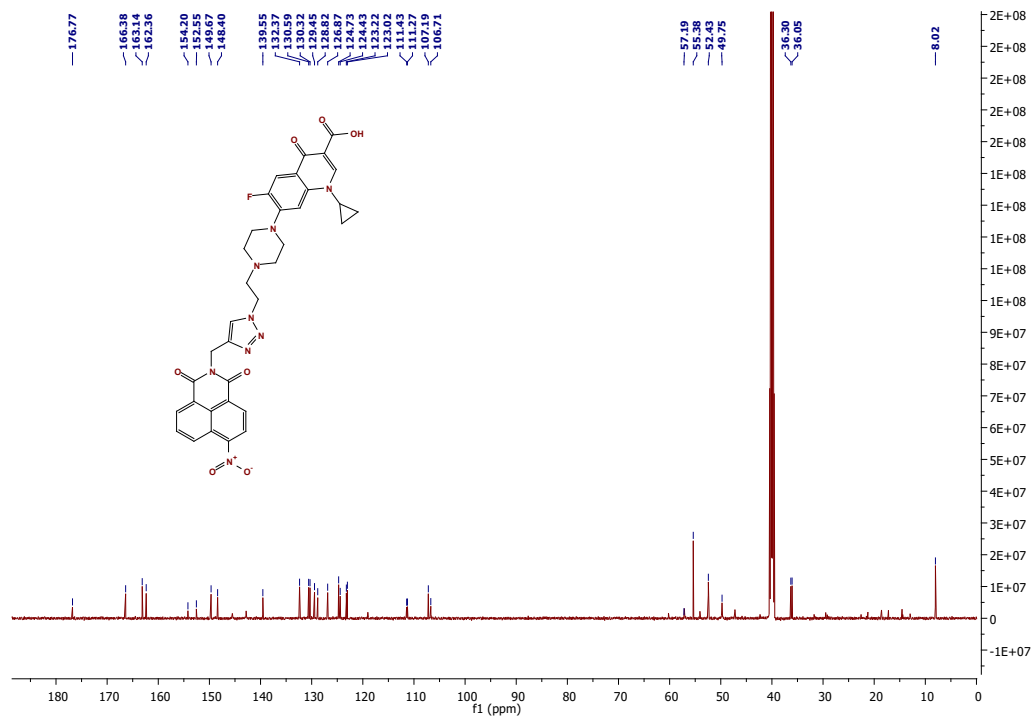

Figure S62.  $^{13}\text{C}$  NMR (151 MHz in  $\text{DMSO}-d_6$ ) of compound (20a)

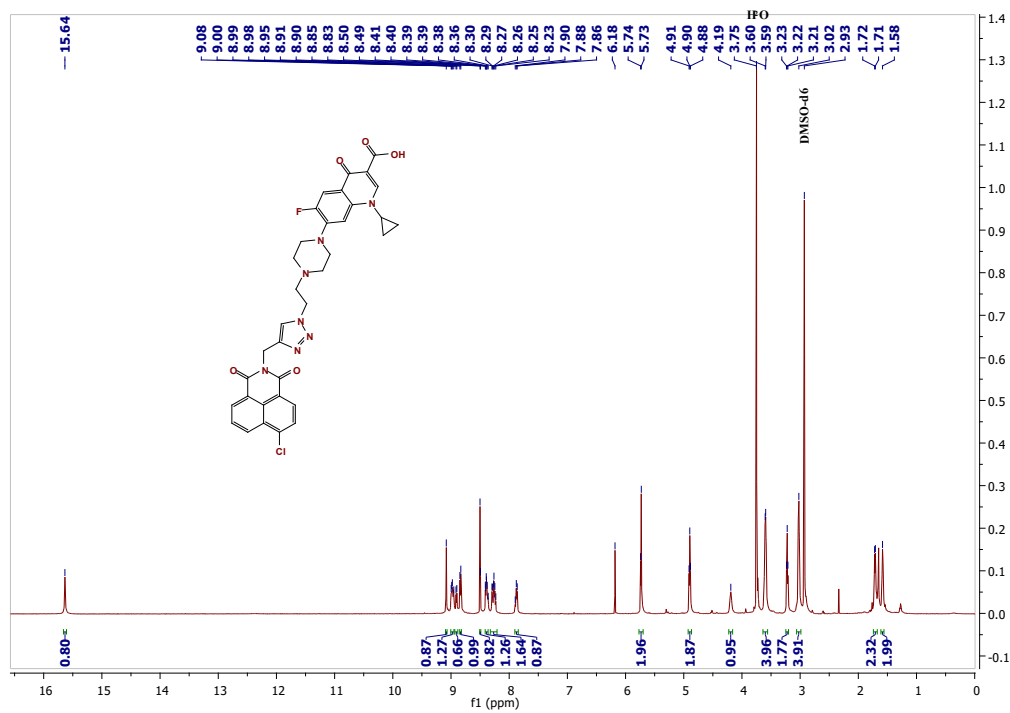

Figure S63. <sup>1</sup>H NMR (500MHz in DMSO-*d*<sub>6</sub>) of compound (20b)

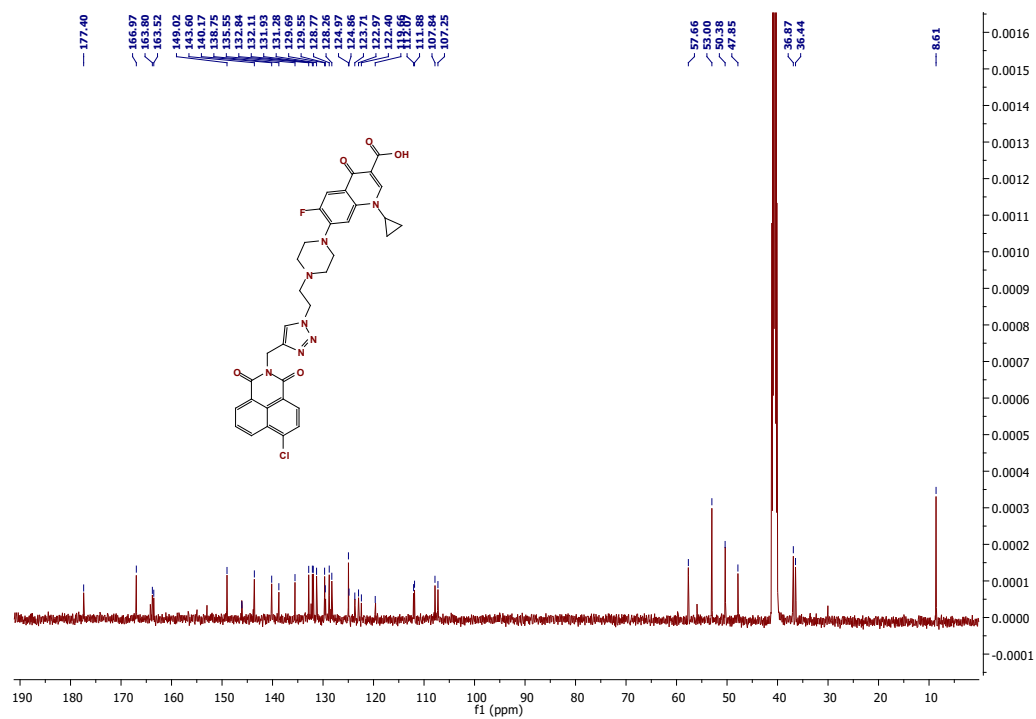

Figure S64. <sup>13</sup>C NMR (126 MHz in DMSO-*d*<sub>6</sub>) of compound (20b)

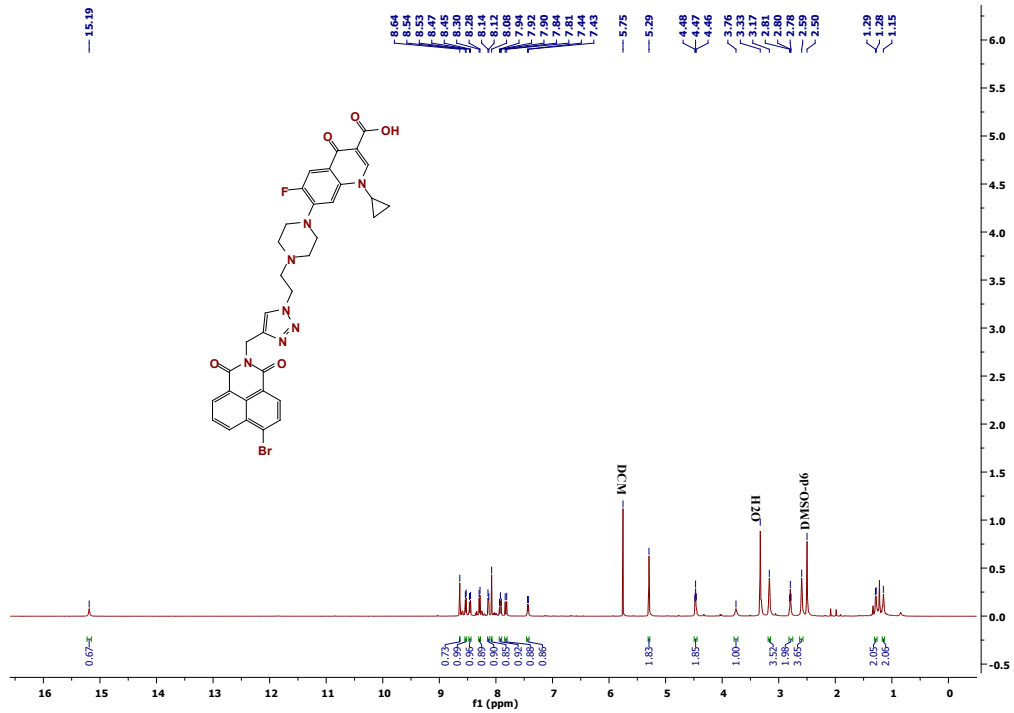

Figure S65.  $^1\text{H}$  NMR (500MHz in  $\text{DMSO-}d_6$ ) of compound (20c)

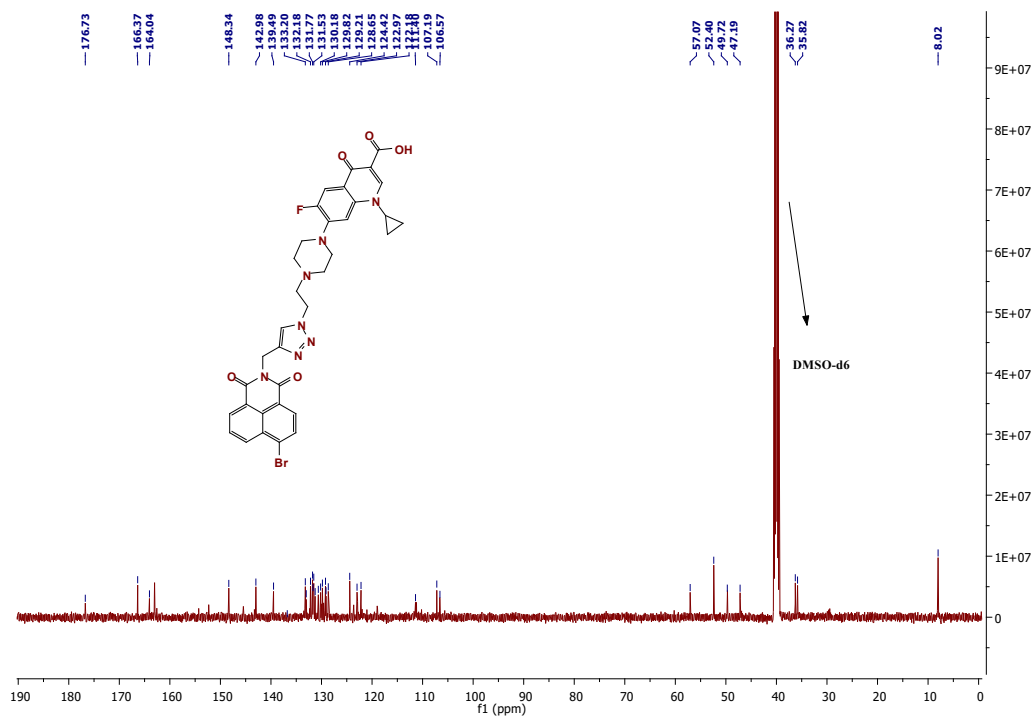

Figure S66.  $^{13}\text{C}$  NMR (126 MHz in  $\text{DMSO-}d_6$ ) of compound (20c)

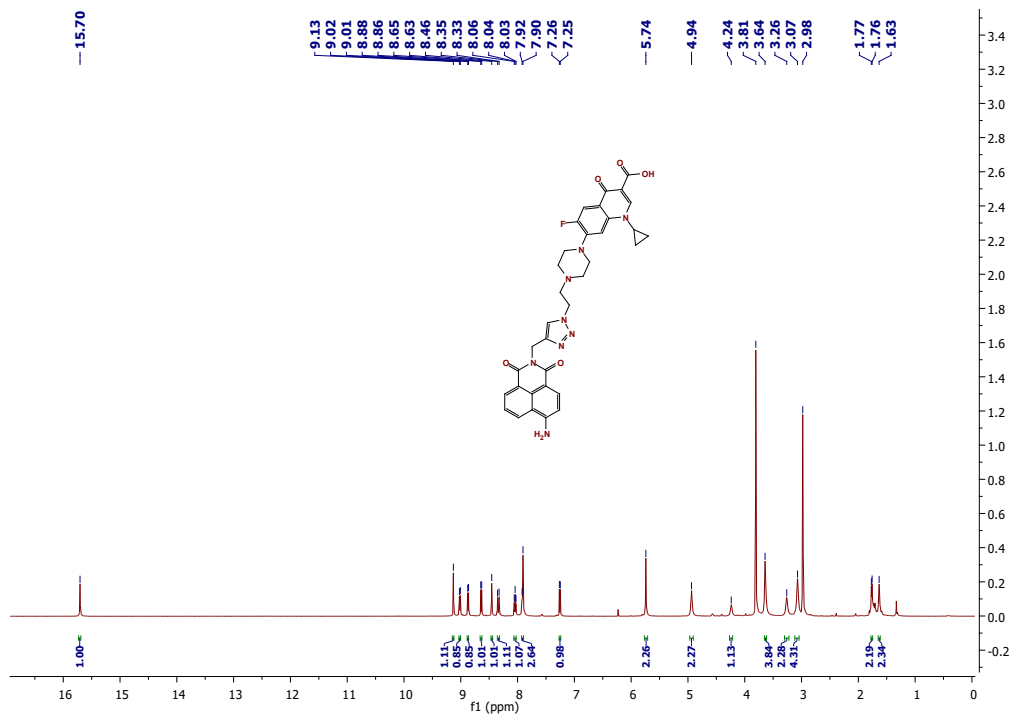

Figure S67.  $^1\text{H}$  NMR (500MHz in  $\text{DMSO-}d_6$ ) of compound (20d)

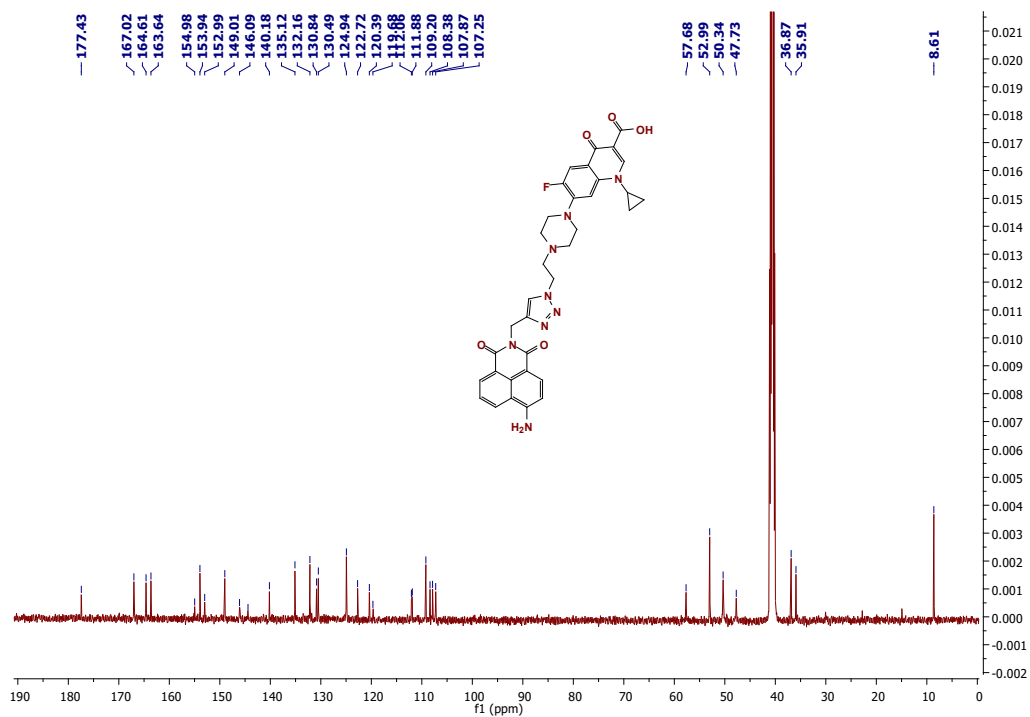

Figure S68.  $^{13}\text{C}$  NMR (126 MHz in  $\text{DMSO-}d_6$ ) of compound (20d)

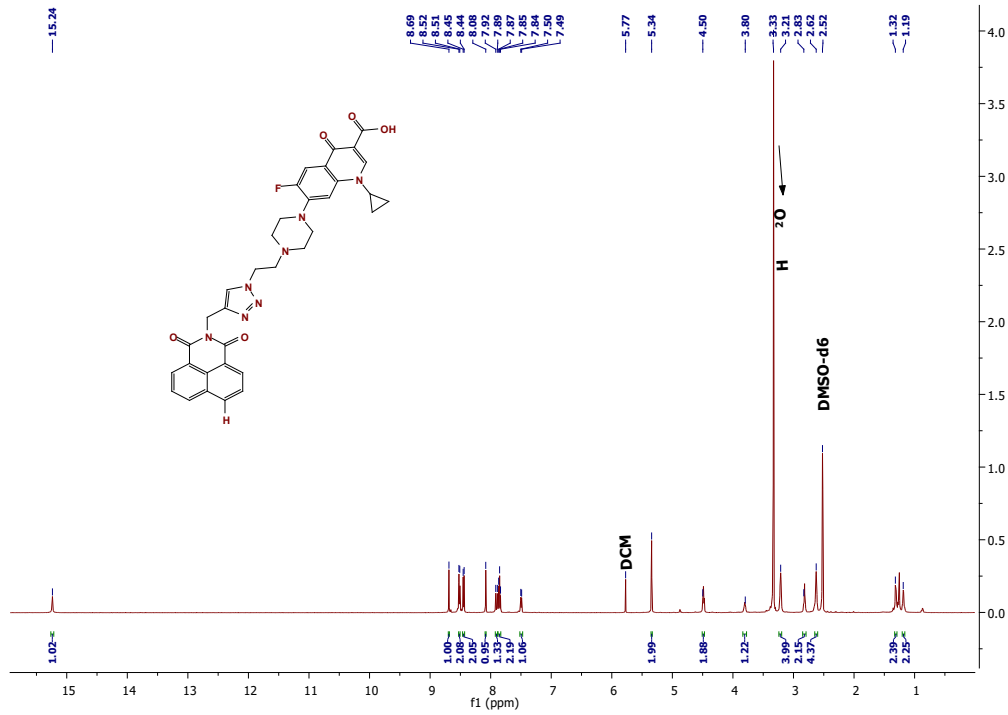

Figure S69. <sup>1</sup>H NMR (500MHz in DMSO-*d*<sub>6</sub>) of compound (20e)

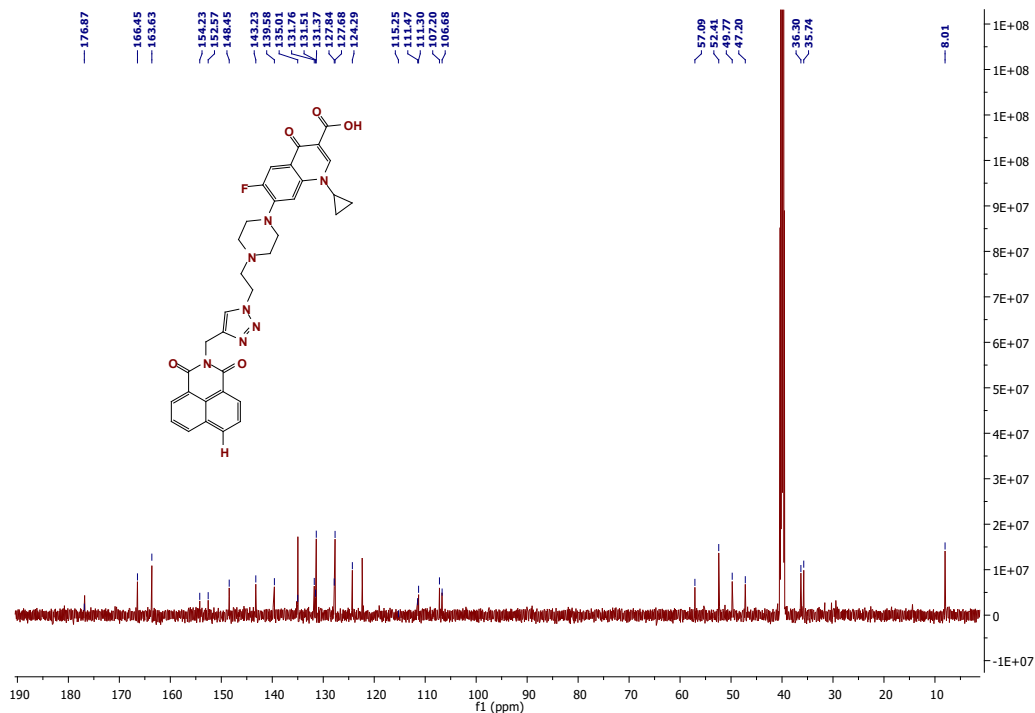

Figure S70. <sup>13</sup>C NMR (151 MHz in DMSO-*d*<sub>6</sub>) of compound (20e)

## HRMS data

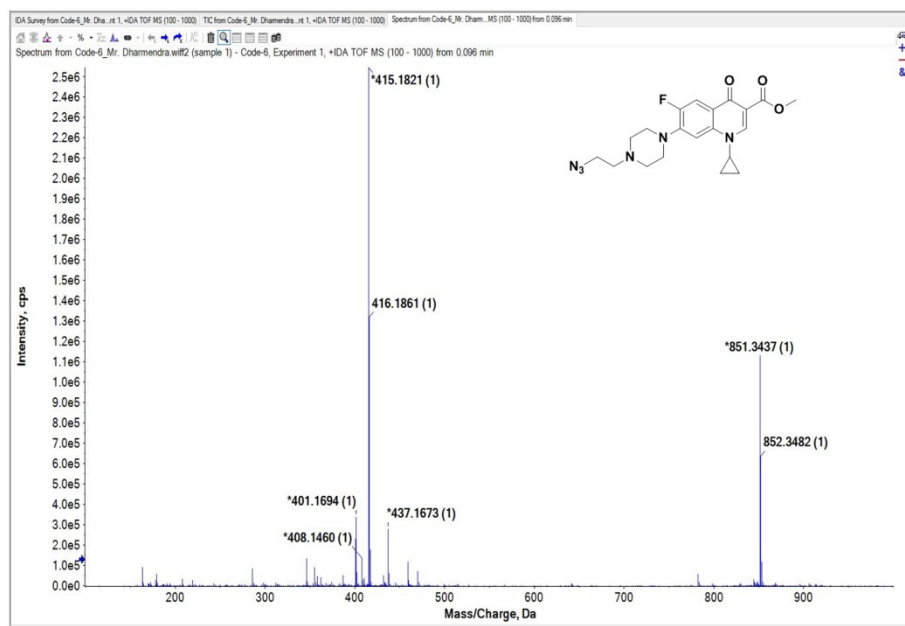

Figure S71. HMRS of compound (3)  $C_{22}H_{27}FN_6O_4$   $[M+H]^+=459.2078$  found 459.2086

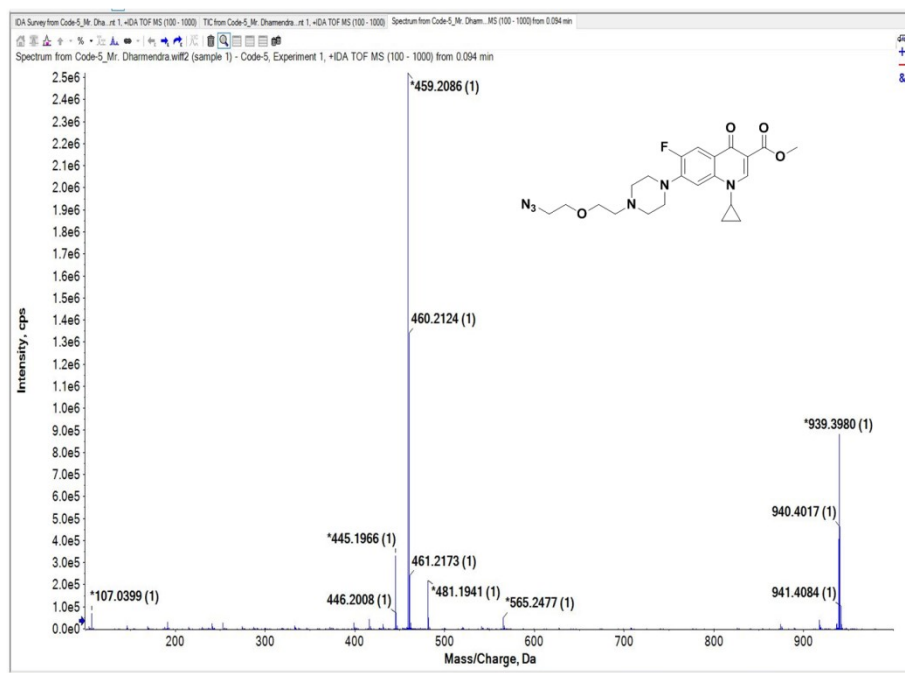

Figure S72. HMRS of compound (4)  $C_{22}H_{27}FN_6O_4$   $[M+H]^+=459.2078$  found 459.2086

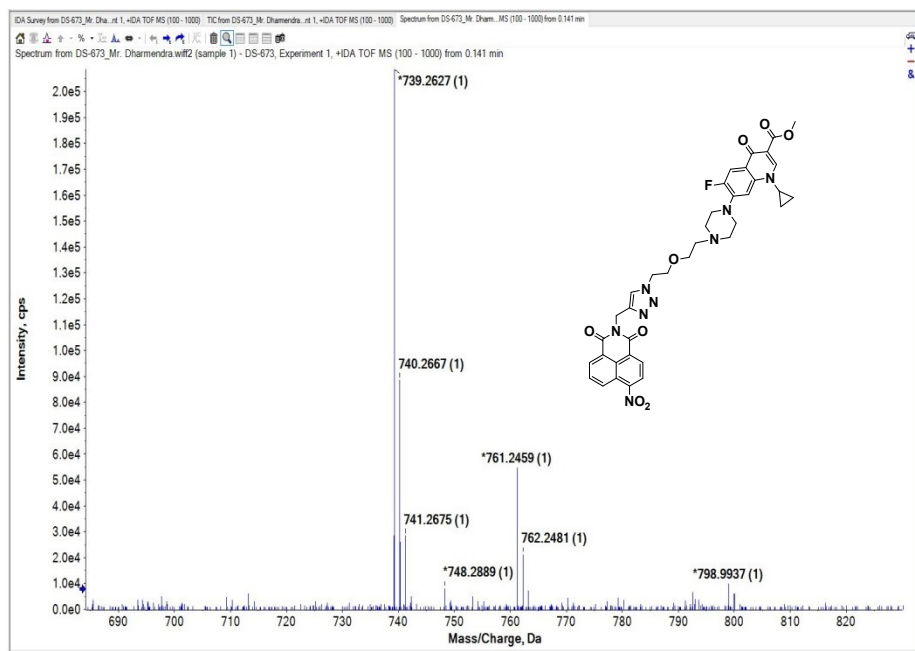

Figure S73. HMRS of compound (17a)  $C_{37}H_{35}FN_8O_8$   $[M+H]^+=739.256$  found 739.2646

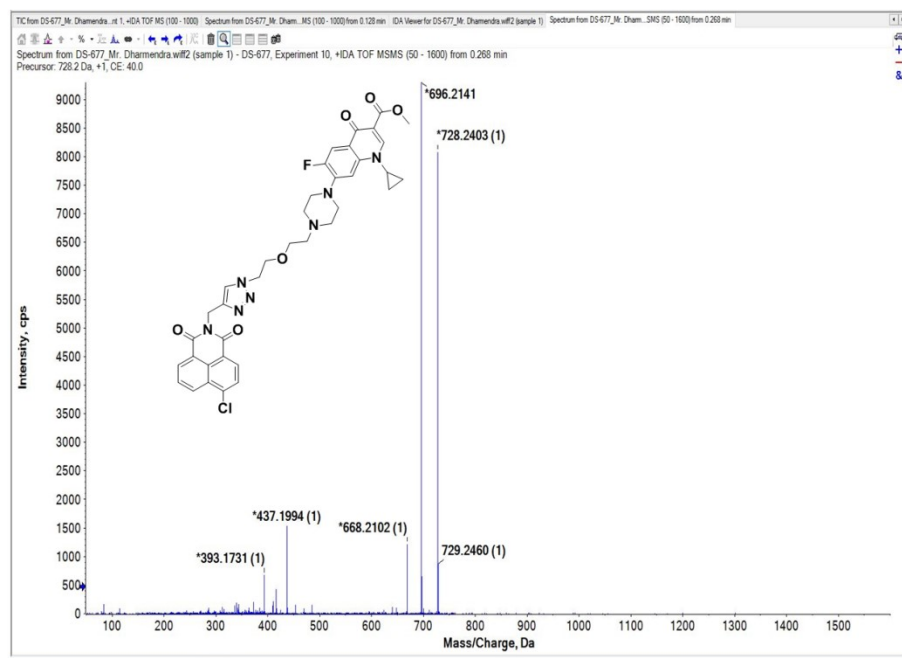

Figure S74. HMRS of compound (17b)  $C_{37}H_{35}ClFN_7O_6$   $[M+H]^+=728.2321$  found 728.2402

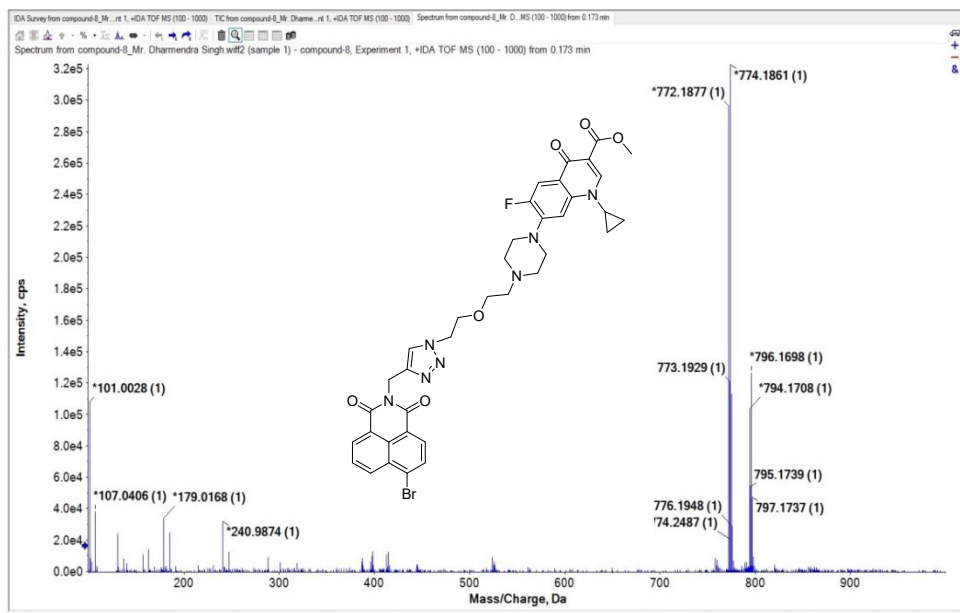

Figure S75. HMRS of compound (17c)  $C_{36}H_{33}BrFN_7O_6$   $[M+H]^+ = 772.1816$  found 772.18

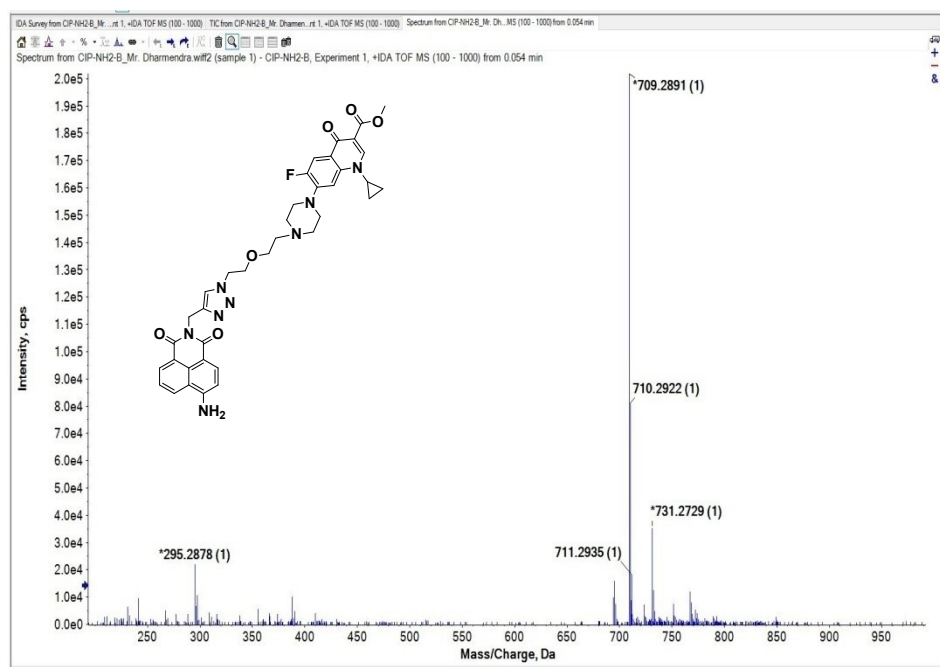

Figure S76. HMRS of compound (17d)  $C_{37}H_{37}FN_8O_6$   $[M+H]^+ = 709.2820$  found 709.2891

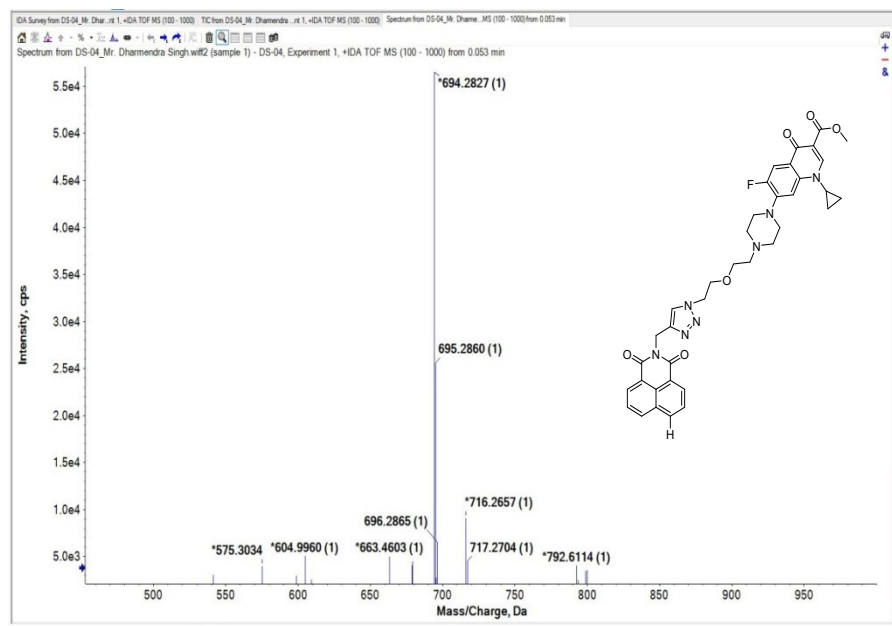

Figure S77. HMRS of compound (17e)  $C_{37}H_{36}FN_7O_6$   $[M+H]^+ = 694.2711$  found 694.2813

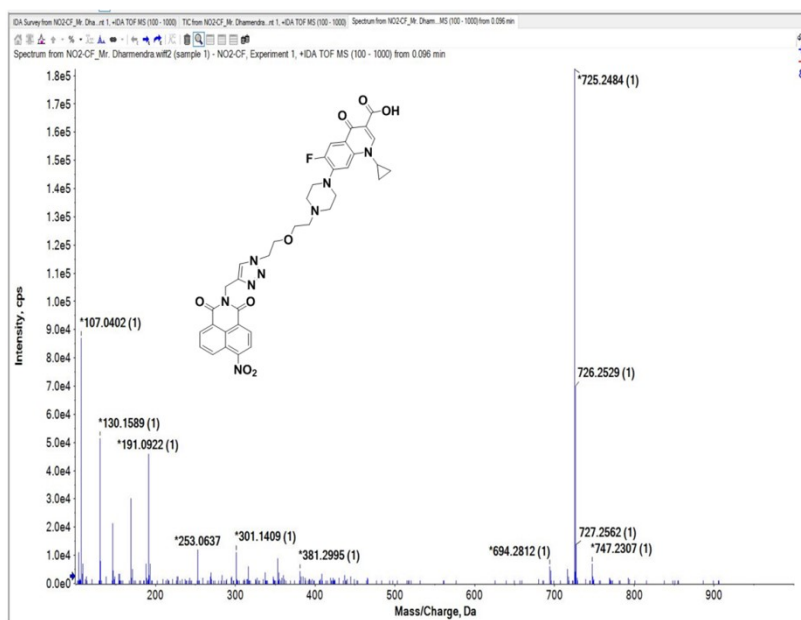

Figure S78. HMRS of compound (18a)  $C_{36}H_{33}FN_8O_8$   $[M+H]^+ = 725.2405$  found 725.2484

|             |                                |                        |         |                 |                                 |
|-------------|--------------------------------|------------------------|---------|-----------------|---------------------------------|
| Sample Name | Sample15                       | Position               | P1-83   | Instrument Name | QTOF                            |
| User Name   | SYSTEM (SYSTEM)                | Inj Vol                | 5       | InjPosition     |                                 |
| Sample Type | Sample                         | IRM Calibration Status | Success | Data Filename   | SRTP-677A.d                     |
| ACQ Method  | DIRECT MASS_POSITIVE_50_1500.m | Comment                |         | Acquired Time   | 12-12-2024 16:37:54 (UTC+05:30) |

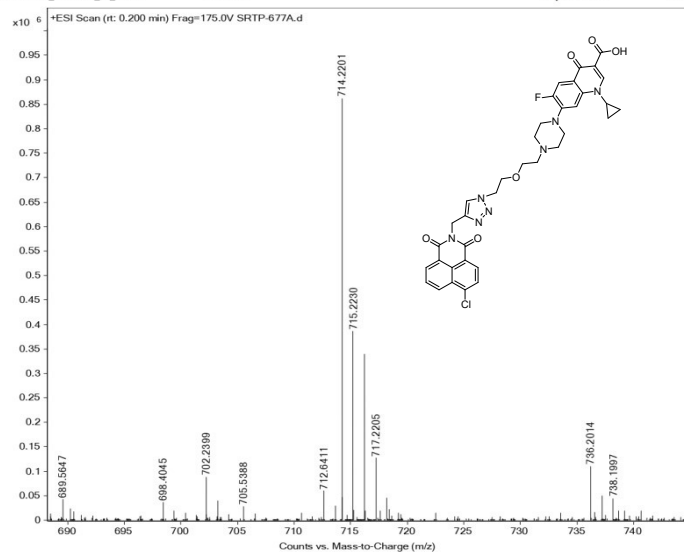

Figure S79. HMRS of compound(18b)  $C_{36}H_{33}ClFN_7O_6$   $[M+H]^+ = 714.2165$  found 714.2201

|             |                                |                        |         |                 |                                 |
|-------------|--------------------------------|------------------------|---------|-----------------|---------------------------------|
| Sample Name | Sample16                       | Position               | P1-84   | Instrument Name | QTOF                            |
| User Name   | SYSTEM (SYSTEM)                | Inj Vol                | 5       | InjPosition     |                                 |
| Sample Type | Sample                         | IRM Calibration Status | Success | Data Filename   | SRTP-678A.d                     |
| ACQ Method  | DIRECT MASS_POSITIVE_50_1500.m | Comment                |         | Acquired Time   | 12-12-2024 16:39:43 (UTC+05:30) |

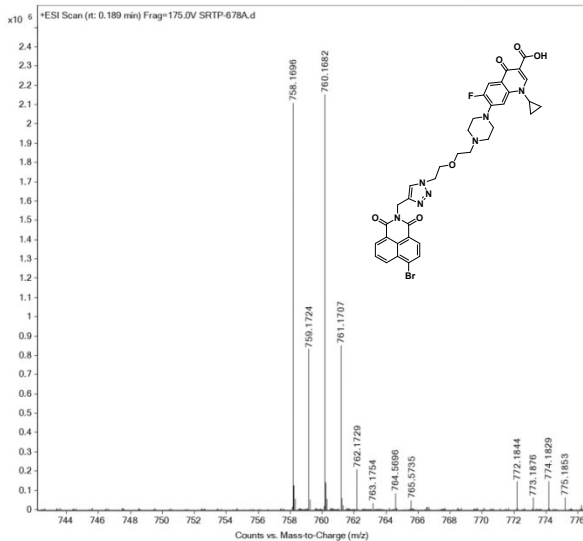

Figure S80. HMRS of compound(18c)  $C_{36}H_{33}BrFN_7O_6$   $[M+H]^+ = 758.166$  found 758.1696

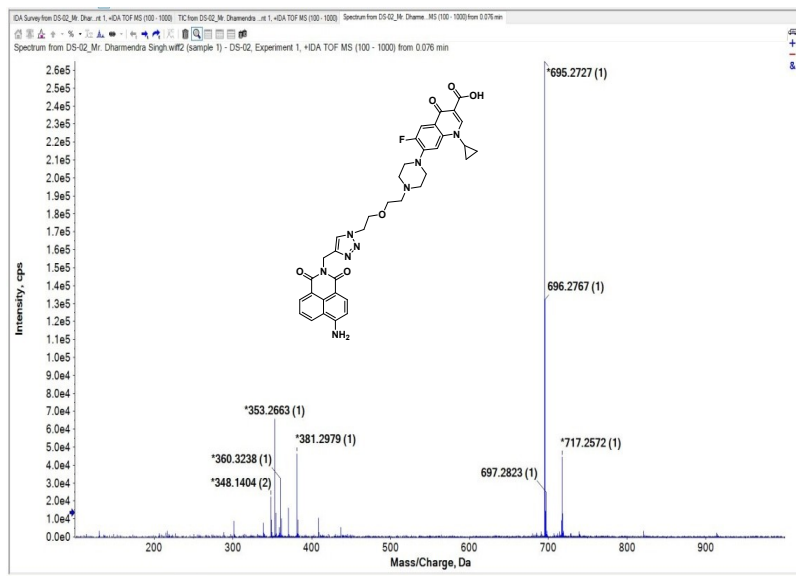

Figure S81. HMRS of compound(18d)  $C_{36}H_{35}FN_8O_6$   $[M+H]^+ = 695.2664$  found 695.262

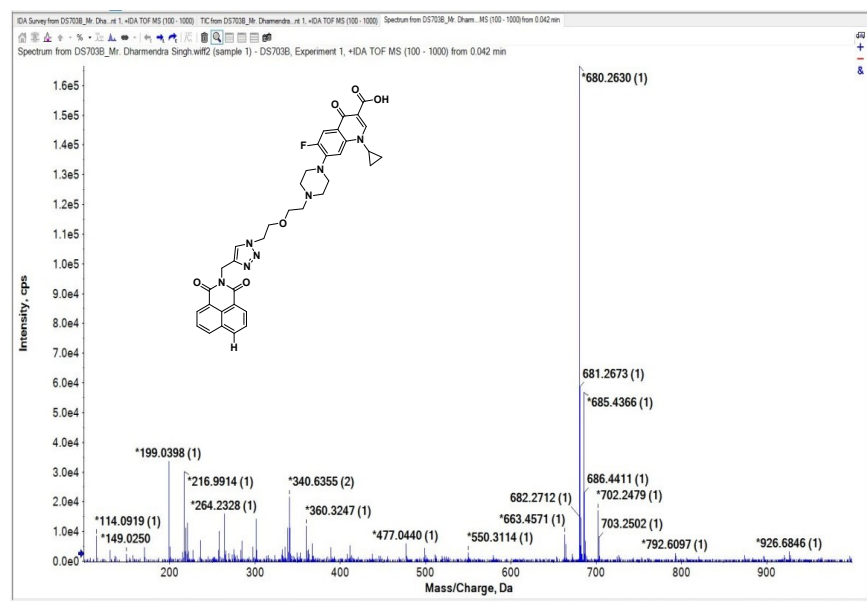

Figure S82. HMRS of compound (18e)  $C_{36}H_{34}FN_7O_6$   $[M+H]^+ = 680.2555$  found 680.2630

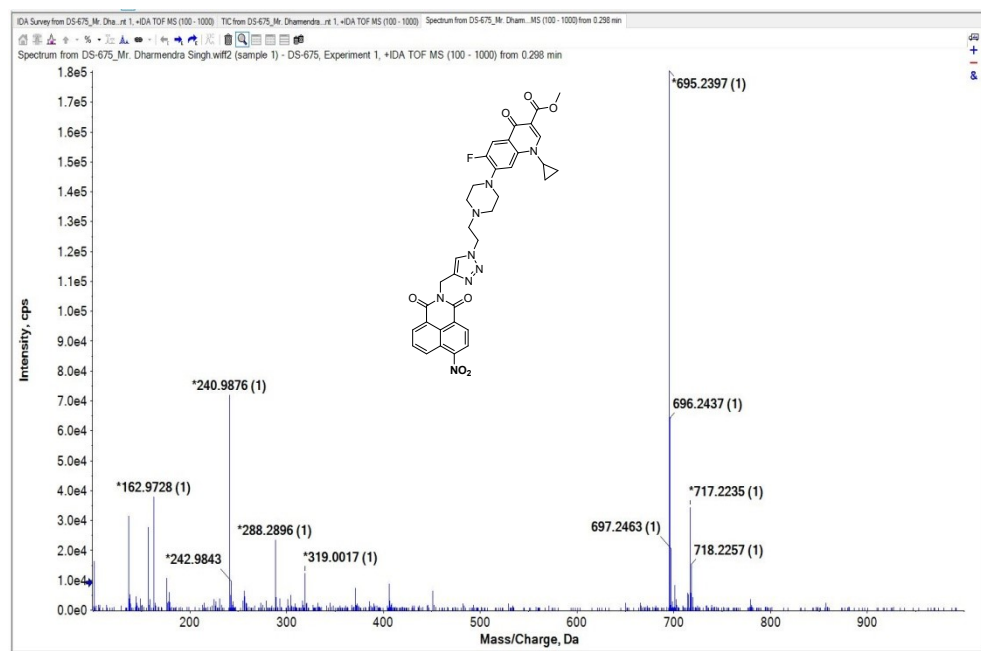

Figure S83. HMRS of compound (19a)  $C_{35}H_{31}FN_8O_7$   $[M+H]^+ = 695.2300$  found 695.2331

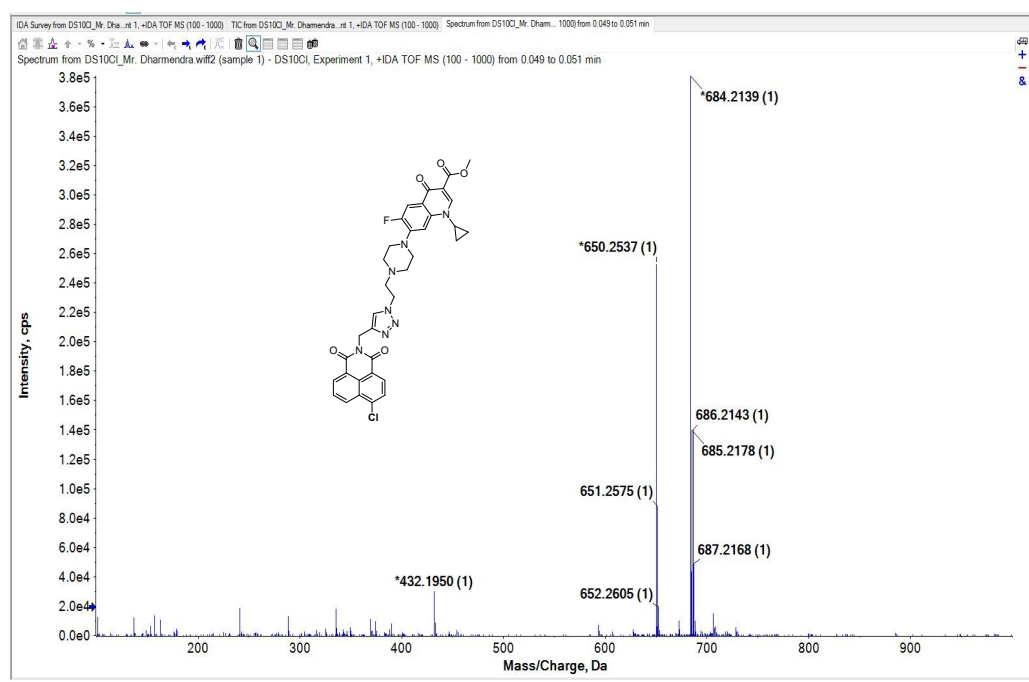

Figure S84. HMRS of compound (19b)  $C_{35}H_{31}ClFN_7O_5$   $[M+H]^+ = 684.2059$  found 684.2053

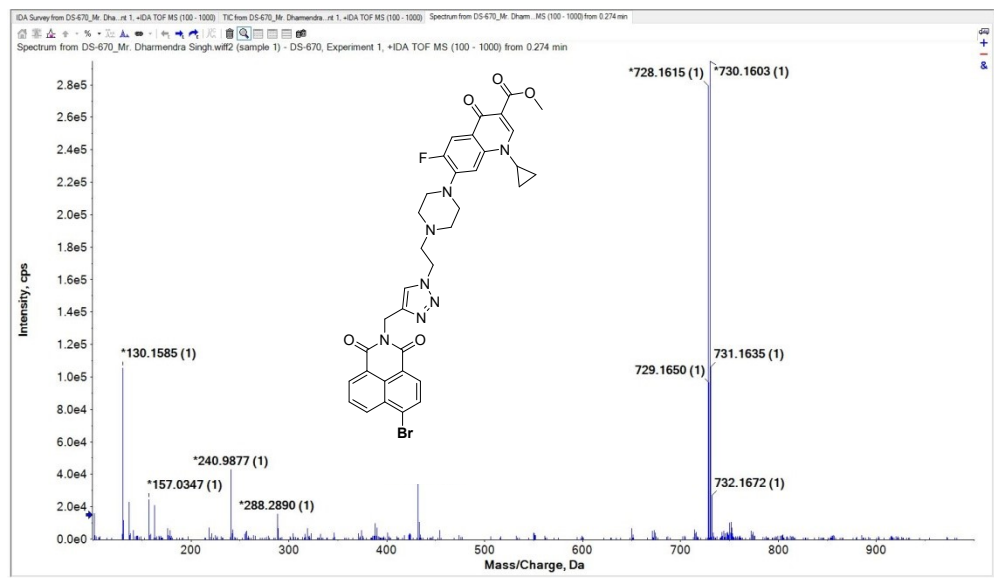

Figure S85. HMRS of compound (19c)  $C_{35}H_{31}BrFN_7O_5$   $[M+H]^+ = 728.1554$  found 728.1584

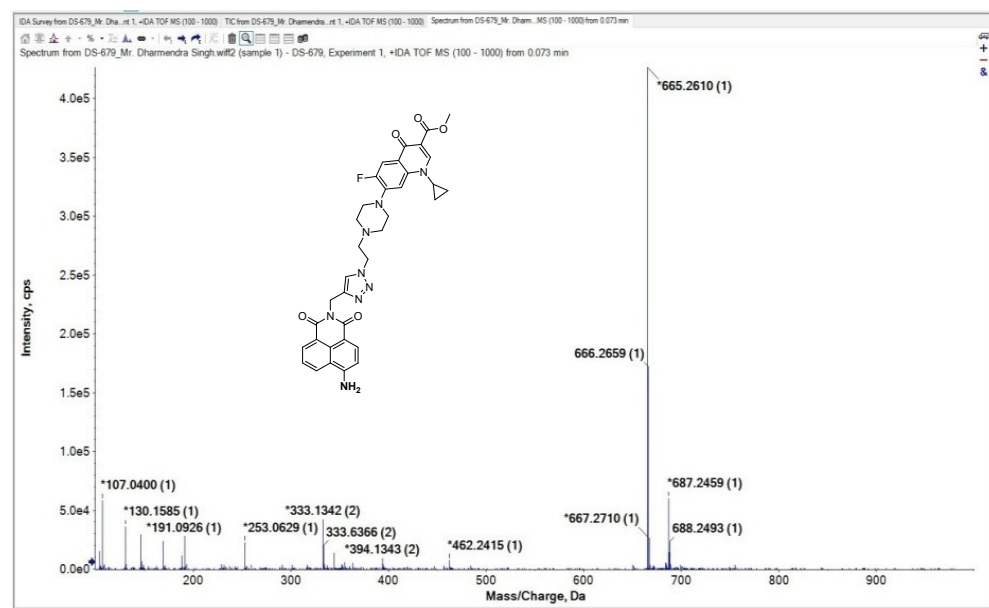

Figure S86. HMRS of compound (19d)  $C_{35}H_{33}FN_8O_5$   $[M+H]^+ = 665.2558$  found 665.2610

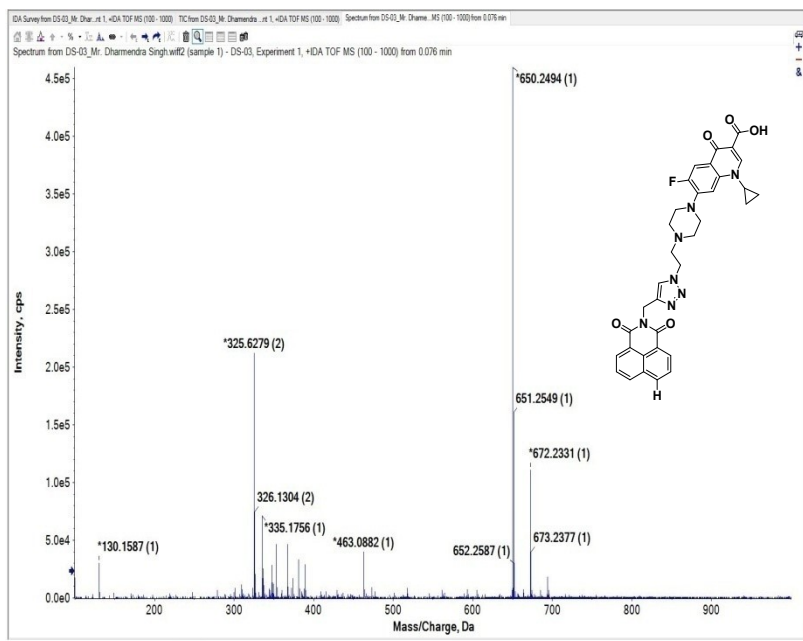

Figure S87. HMRS of compound (19e)  $C_{35}H_{32}FN_7O_5$   $[M+H]^+ = 650.2494$  found 650.2494

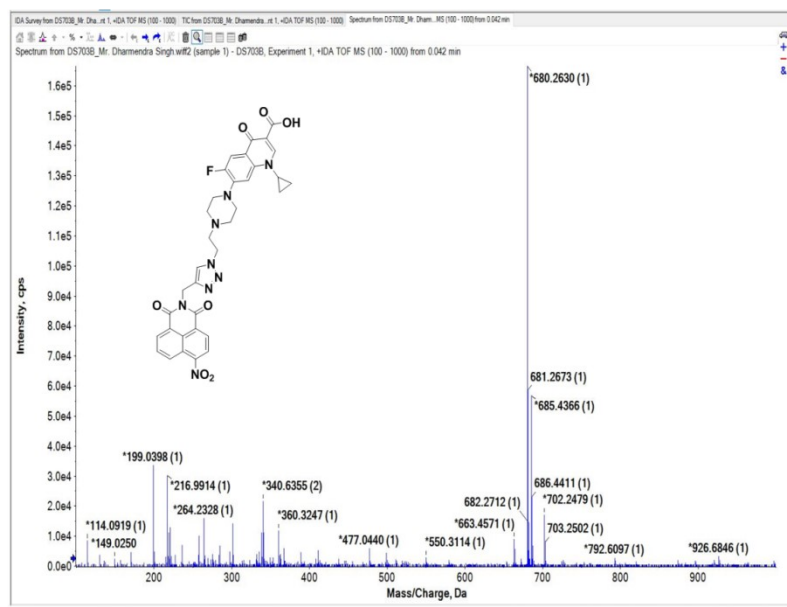

Figure S88. HMRS of compound (20a)  $C_{34}H_{29}FN_8O_7$   $[M+H]^+ = 681.2143$  found 681.2202

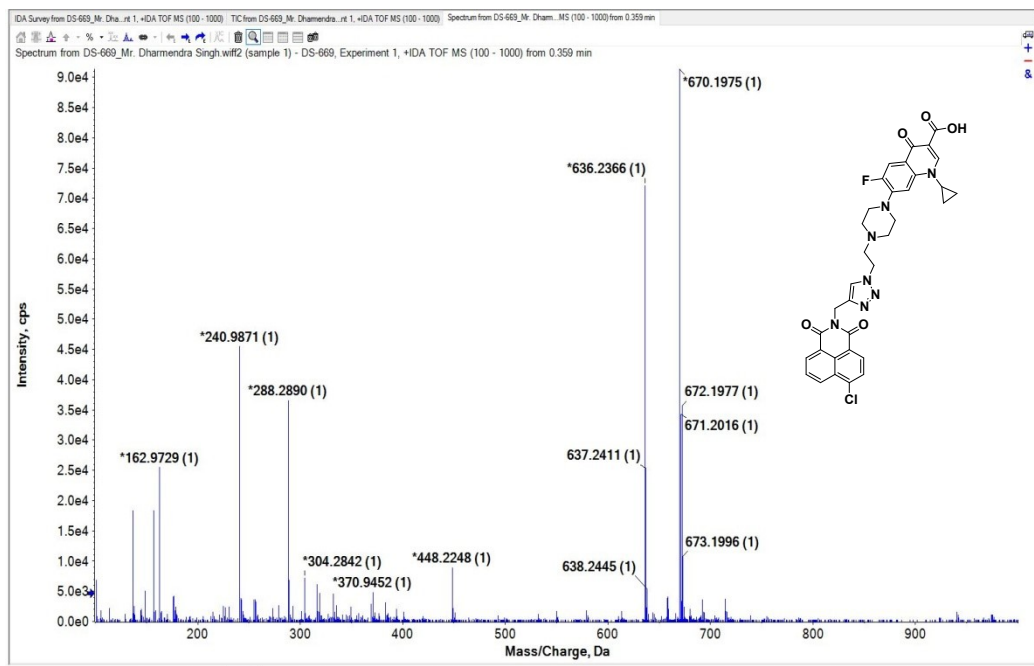

Figure S89. HMRS of compound (20b)  $C_{35}H_{32}FN_7O_5$   $[M+H]^+ = 670.1940$  found 670.1968

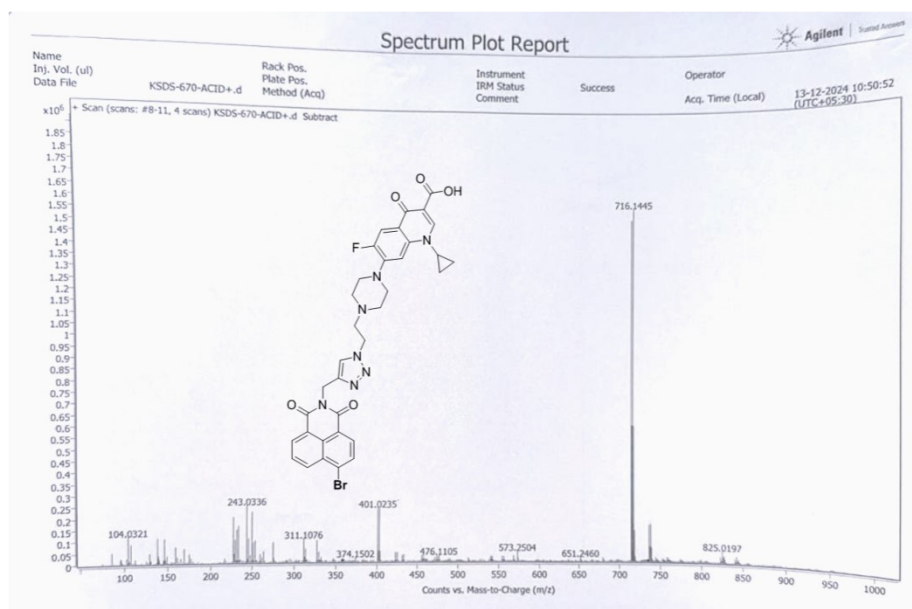

Figure S90. HMRS of compound (20c)  $C_{34}H_{29}BrFN_7O_5$   $[M+H]^+ = 714.1398$  found 714.1445

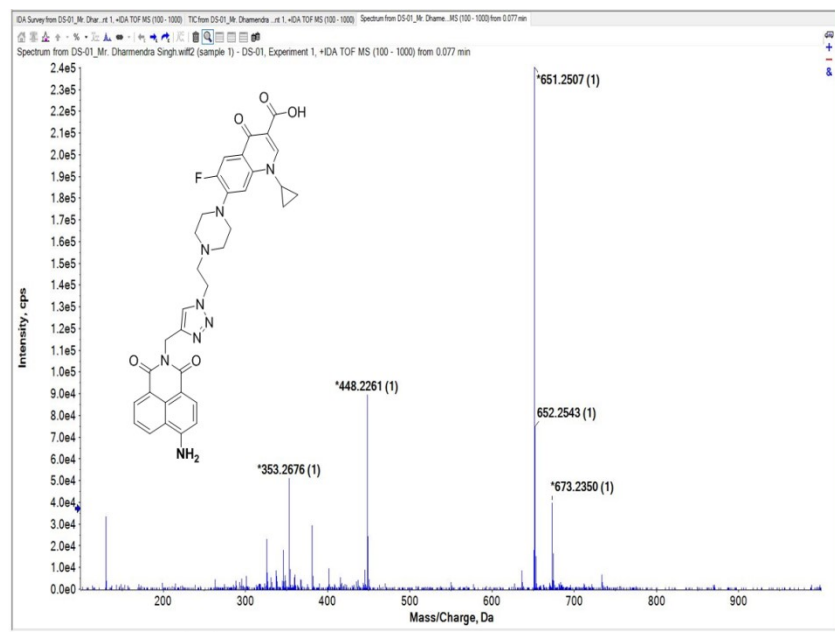

Figure S91. HMRS of compound (20d)  $C_{34}H_{31}FN_8O_5$   $[M+H]^+ = 651.2410$  found 651.2507

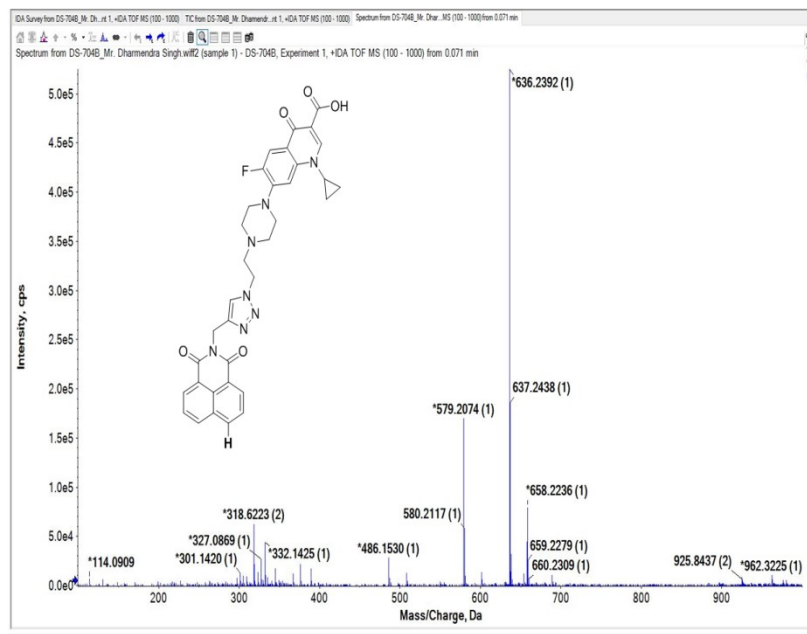

Figure S92. HMRS of compound (20e)  $C_{34}H_{30}FN_8O_5$   $[M+H]^+ = 636.2292$  found 636.2392

The first derivative curve of Thermal Denaturation study

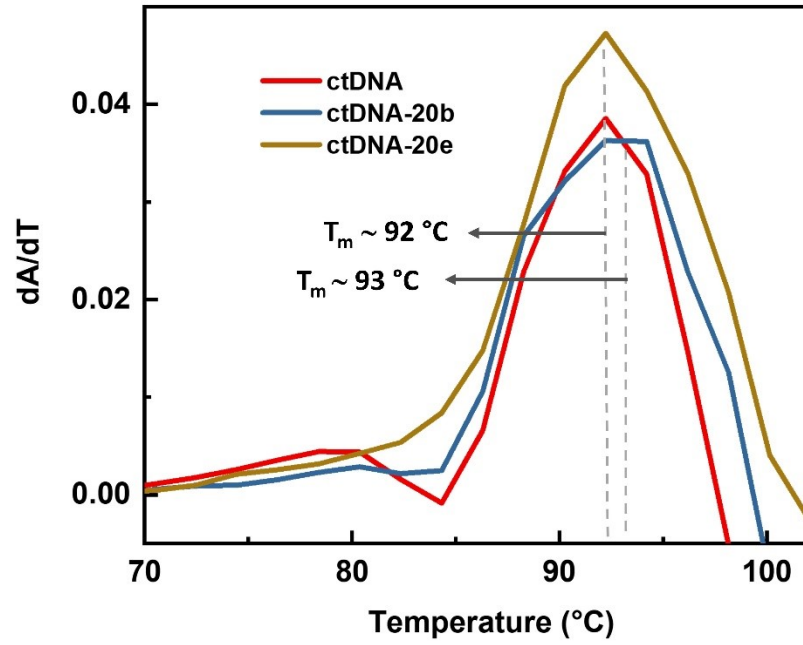

Figure S93. First derivative plot of ctDNA, ctDNA-20b (1:1), and ctDNA-20e (1:1) systems in Trizma hydrochloride buffer solution (pH 7.4) with their melting temperature.

## Molecular dynamic analysis

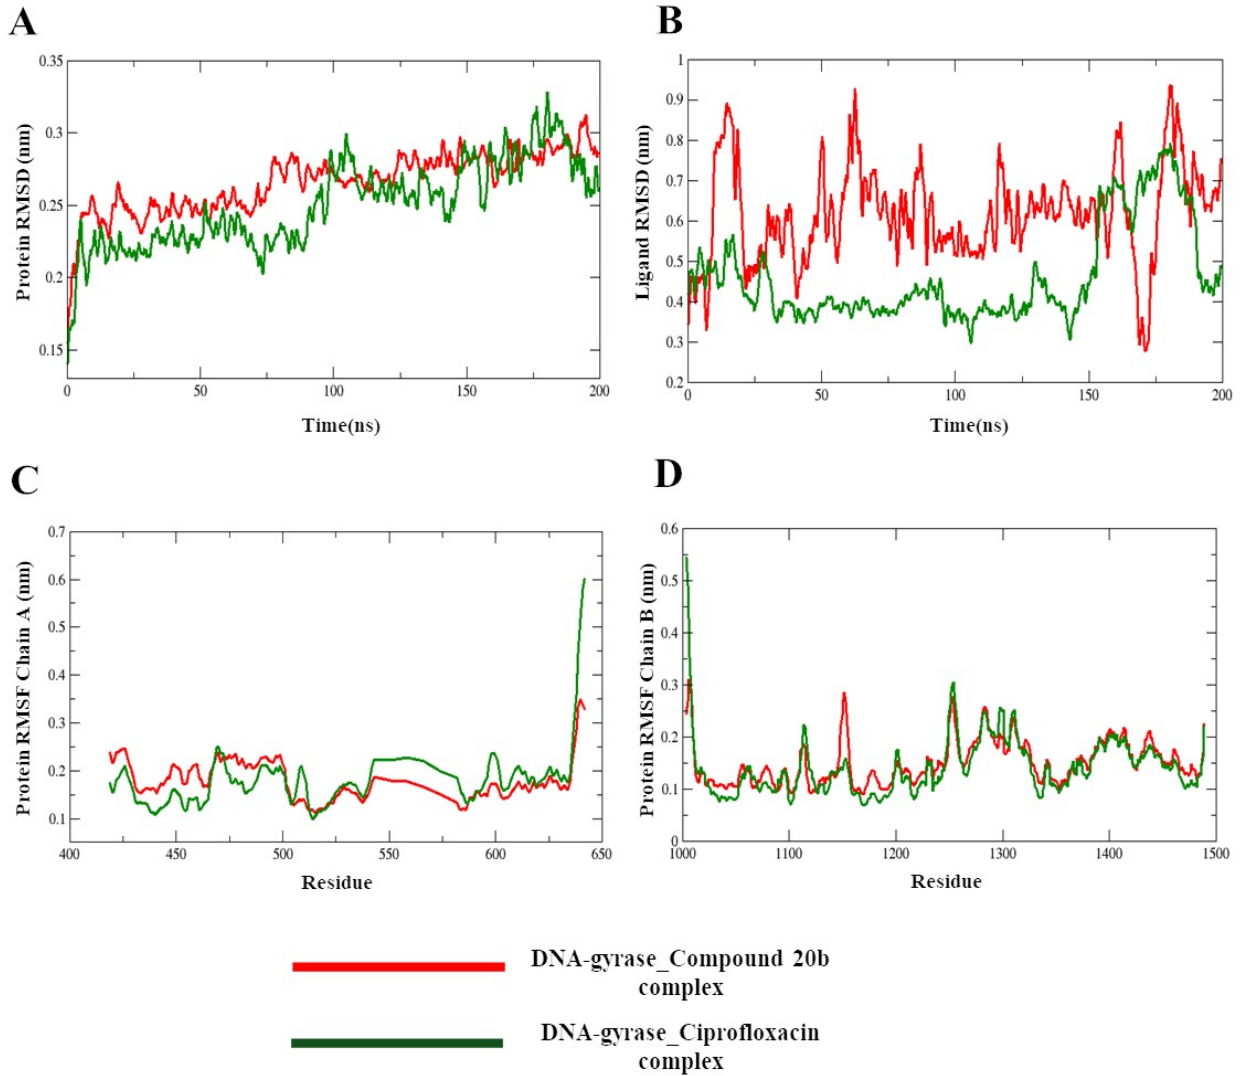

Figure S94. Molecular dynamic analysis of DNA gyrase-compound 20b complex and DNA gyrase-Ciprofloxacin complex (A) Protein RMSD, (B) Ligand RMSD, (C) Protein RMSF Chain A (D) Protein RMSF Chain B.

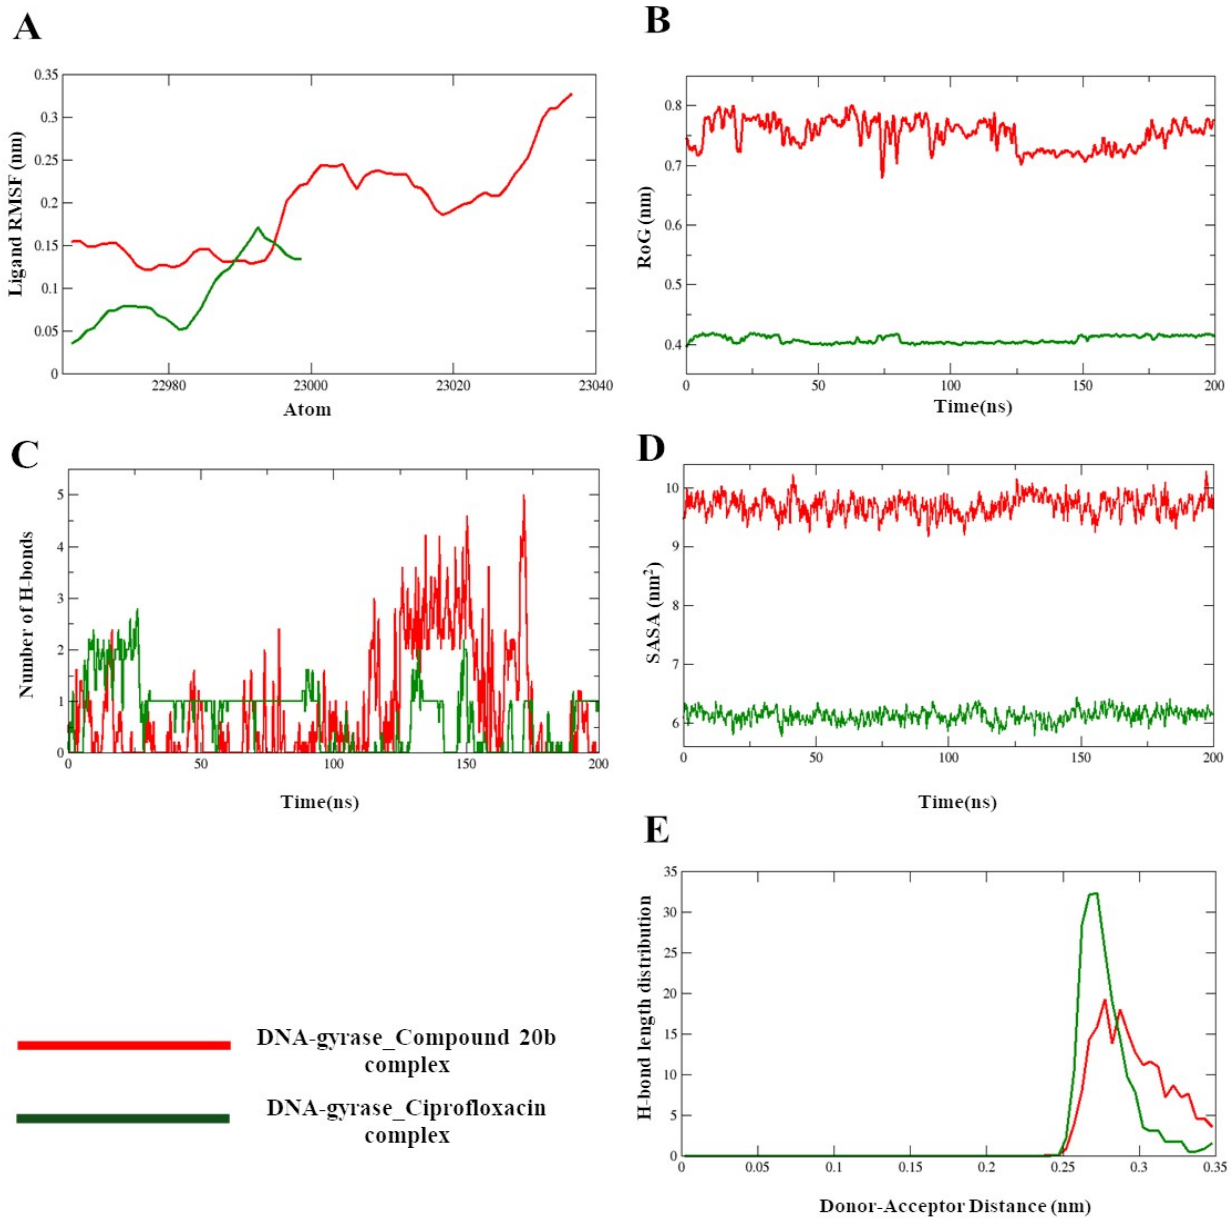

Figure S95. Molecular dynamic analysis of DNA gyrase compound 20b complex and DNA gyrase Ciprofloxacin complex, (A) Ligand RMSF, (B) RoG, (C) Number of H-bonds, (D) SASA, (E) H-bond length distribution.
